# Supplementary material for: An integrated approach to unravel a crucial structural property required for the function of the insect steroidogenic Halloween protein Noppera-bo
Source: PubMed Central journal article supplement (PMC7242711; doi:10.1074/jbc.ra119.011463), 2020-04-02
Supplement: supp_RA119.011463_156438_3_supp_498023_q7y5mk.pdf [file supp_RA119.011463_156438_3_supp_498023_q7y5mk.pdf]

Supplementary Information for

**An integrated approach unravels a crucial structural property for the function of the insect steroidogenic Halloween protein Noppera-bo**

Kotaro Koiwai, Kazue Inaba, Kana Morohashi, Sora Enya, Reina Arai, Hirotatsu Kojima, Takayoshi Okabe, Yuuta Fujikawa, Hideshi Inoue, Ryunosuke Yoshino, Takatsugu Hirokawa, Koichiro Kato, Kaori Fukuzawa, Yuko Shimada-Niwa, Akira Nakamura, Fumiaki Yumoto, Toshiya Senda and Ryusuke Niwa

Corresponding author: Ryusuke Niwa  
Email: ryusuke-niwa@tara.tsukuba.ac.jp

**This PDF file includes:**

Figs. S1 to S12  
Tables S1 to S5  
Legends of Movie 1 and 2

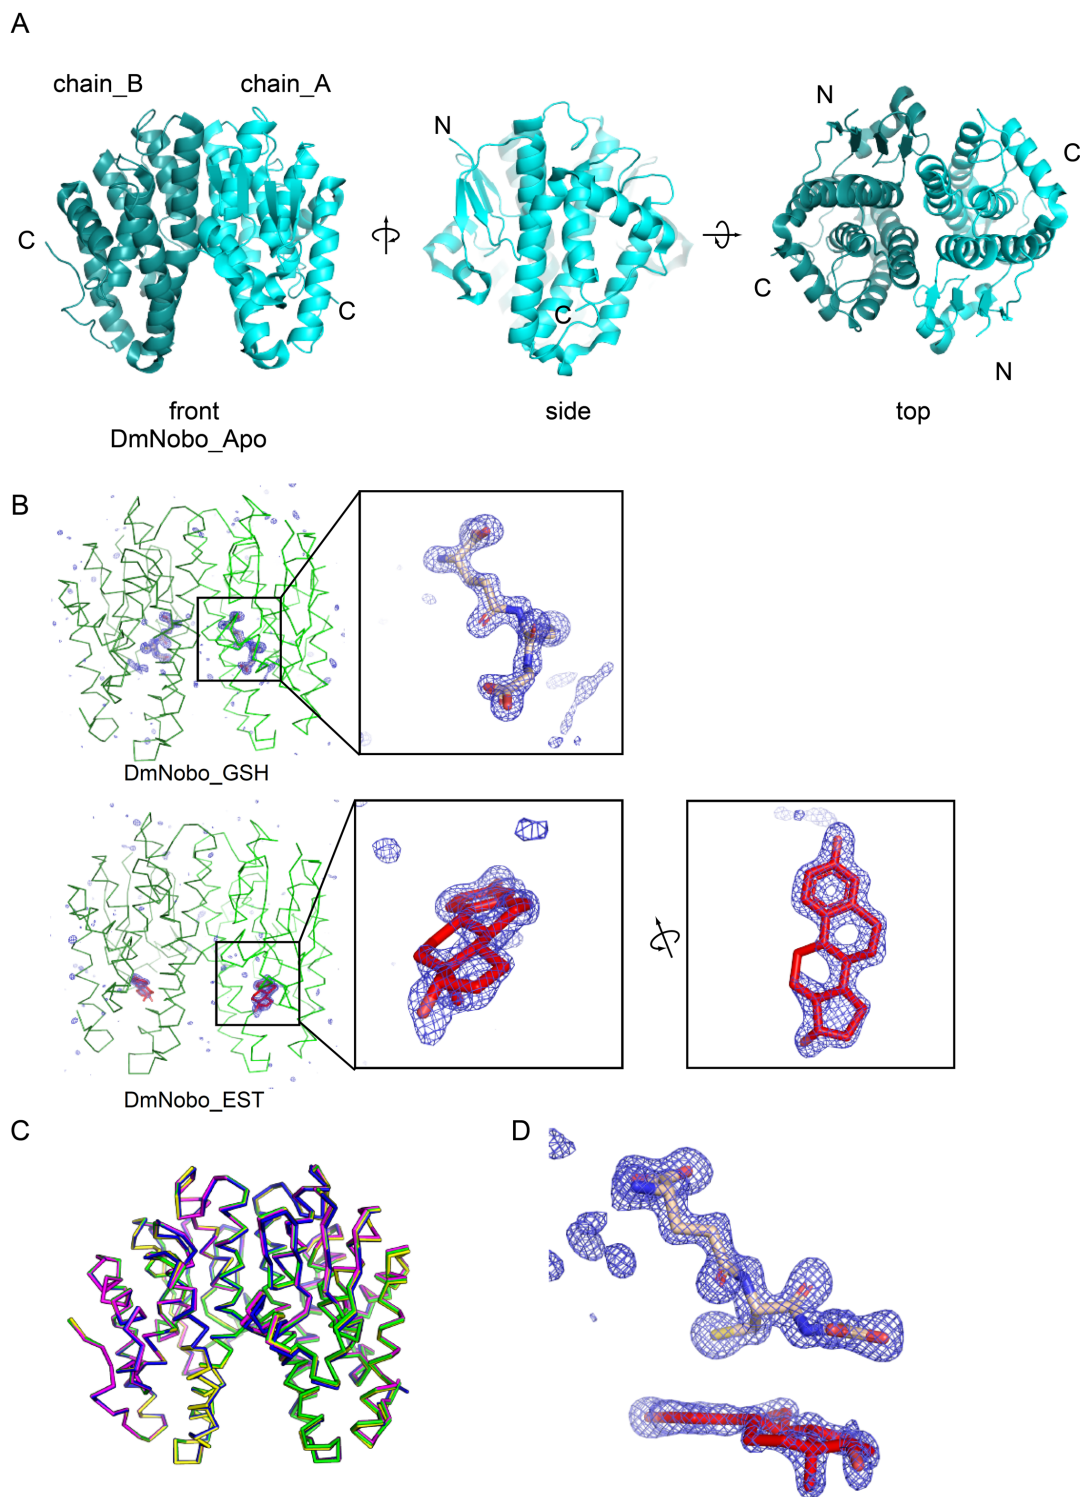

**Fig. S1. Overall structures of DmNobo.**

(A) The overall structure of DmNobo\_Apo is represented as a ribbon diagram. Chains A and B are colored in cyan and turquoise, respectively. (B) Simulated annealing-omit maps of GSH and EST in DmNobo\_GSH and DmNobo\_EST, respectively. *mFo-DFc* maps (blue) are contoured at the  $4.0\sigma$  level and shown with a blue mesh. A ribbon model of the DmNobo protein (green) and stick models of GSH and EST molecules are shown. Carbon atoms in GSH and EST are colored wheat and red, respectively. Oxygen atoms and nitrogen atoms are colored in green and blue, respectively. (C) Superimposed crystal structures of DmNobo\_Apo

(blue), DmNobo\_GSH (yellow), DmNobo\_EST (magenta), and DmNobo\_EST-GSH (green). Least square (LSQ) fittings were performed with the  $C\alpha$  atoms of chain A. RMSD values from the LSQ fittings are summarized in Table S1. (D) Simulated annealing-omit maps of GSH and EST in the DmNobo\_EST-GSH structure.  $mF_o - DFc$  maps (blue) are contoured at  $4.0\sigma$  and shown with a blue mesh. GSH and EST molecules are shown as stick models.

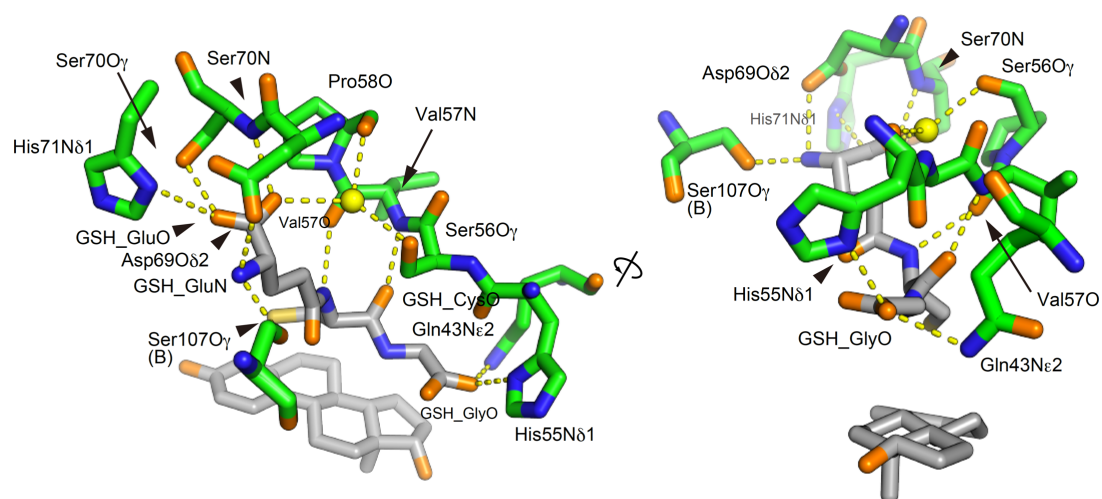

**Fig. S2. A hydrogen-bond network between DmNobo and GSH.**

Hydrogen bonds are indicated with yellow dashed lines. Carbon atoms of the protein and ligands (GSH, EST) are shown in green and gray, respectively. One of the two conformations of Ser107, in which the O $\gamma$  atom is directed towards GSH, is shown.

A

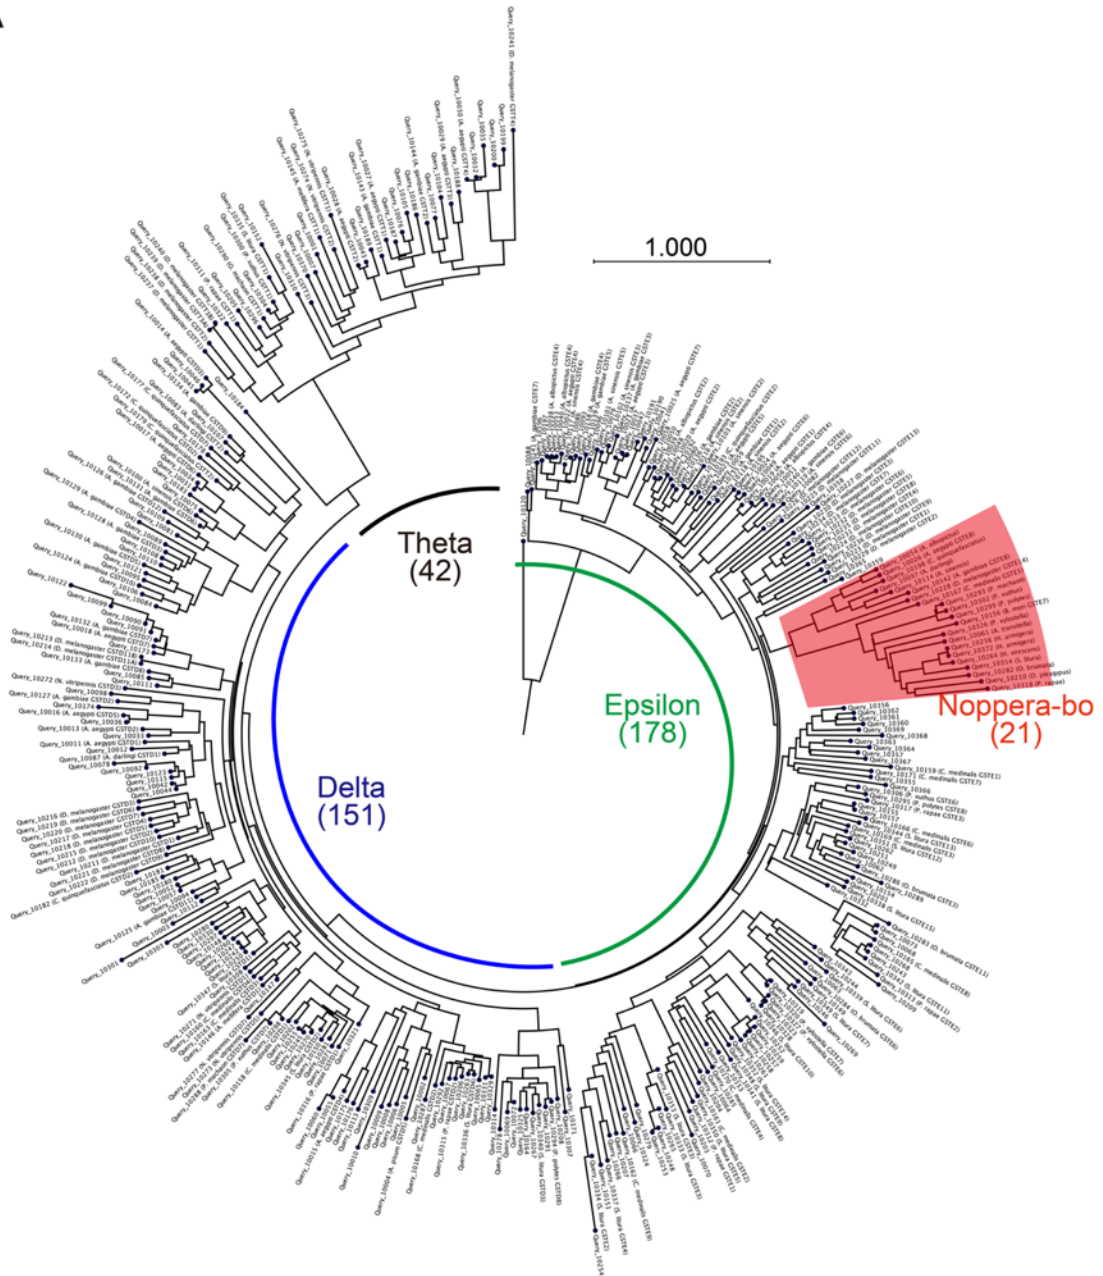

B

G-site: 350 GSTD/E/T

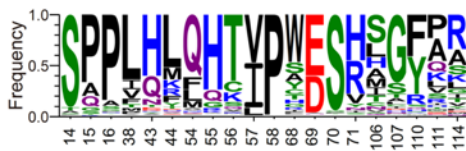

G-site: 21 Noppera-bo

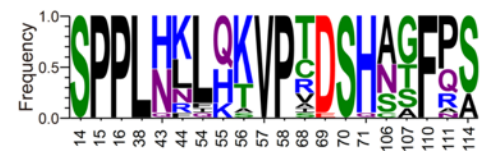

**Fig. S3. Phylogenetic analysis of the delta, epsilon, and theta classes of GST.**

(A) Phylogenetic tree of the insect GSTD/E/T proteins listed in Table S5. A clade of the *nobo* family is highlighted in red. (B) Frequencies of amino acid residues composing the G-site of 350 GSTD/E/T (left) and 21 Nobo (right) proteins displayed in A. The frequencies were calculated using LOGO, and Nobo proteins were excluded from the GSTD/E/T proteins for the frequency calculation.

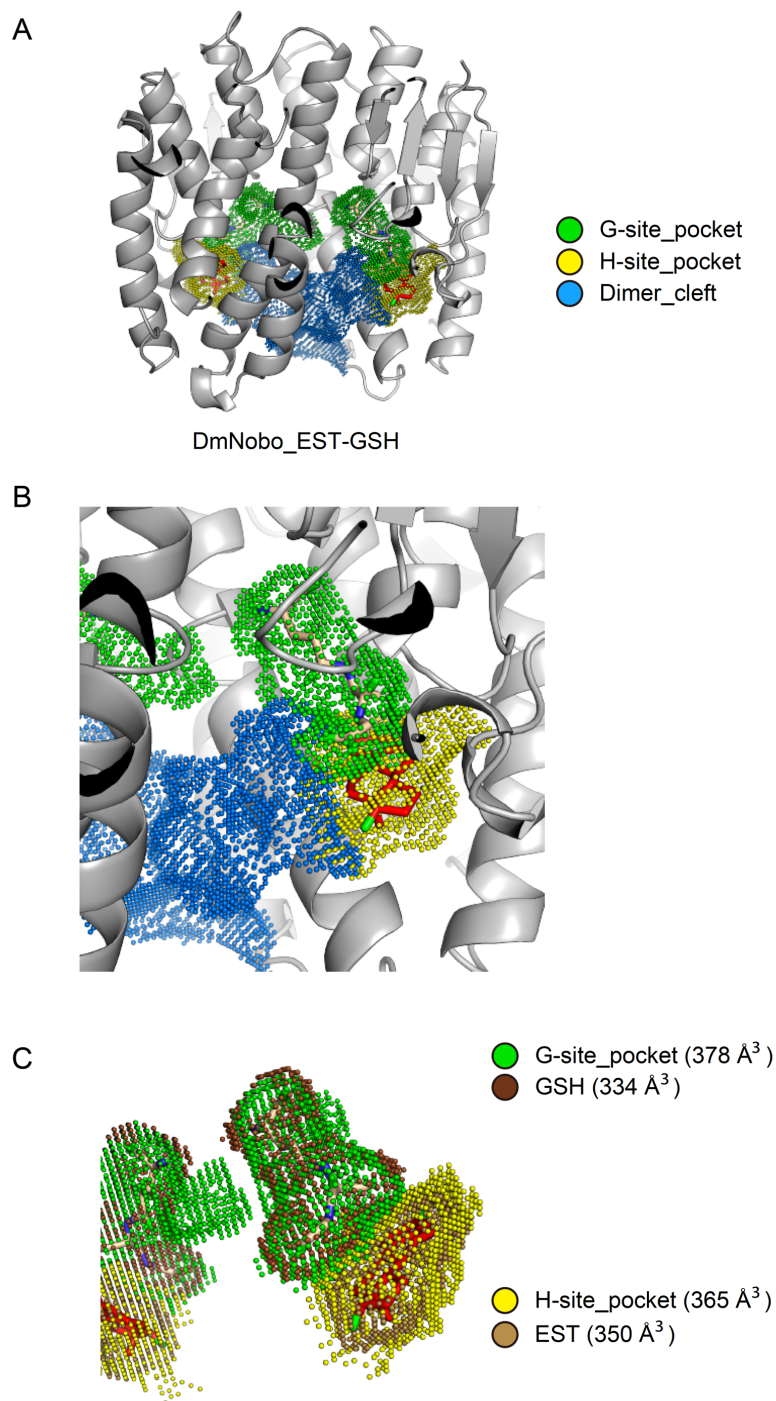

**Fig. S4. Pockets in the G- and H-sites of DmNobo**

(A, B) Pockets in DmNobo were calculated using 3V. The inner surfaces of the two pockets, i.e., the G- and H-sites, are represented in green and yellow dots, respectively. The cleft between the two subunits of the DmNobo\_EST-GSH are shown in blue. The G-site was calculated using the crystal structure of the DmNobo\_EST-GSH complex without GSH, and the H-site was calculated using the crystal structure of the DmNobo\_EST-GSH complex without EST. (B) An enlarged view of the G- and H-sites. (C) The solvent-accessible surfaces of GSH and EST are represented with brown and light brown dots, respectively. The surfaces of the G- and H-sites are superimposed on GSH (green) and EST (yellow).

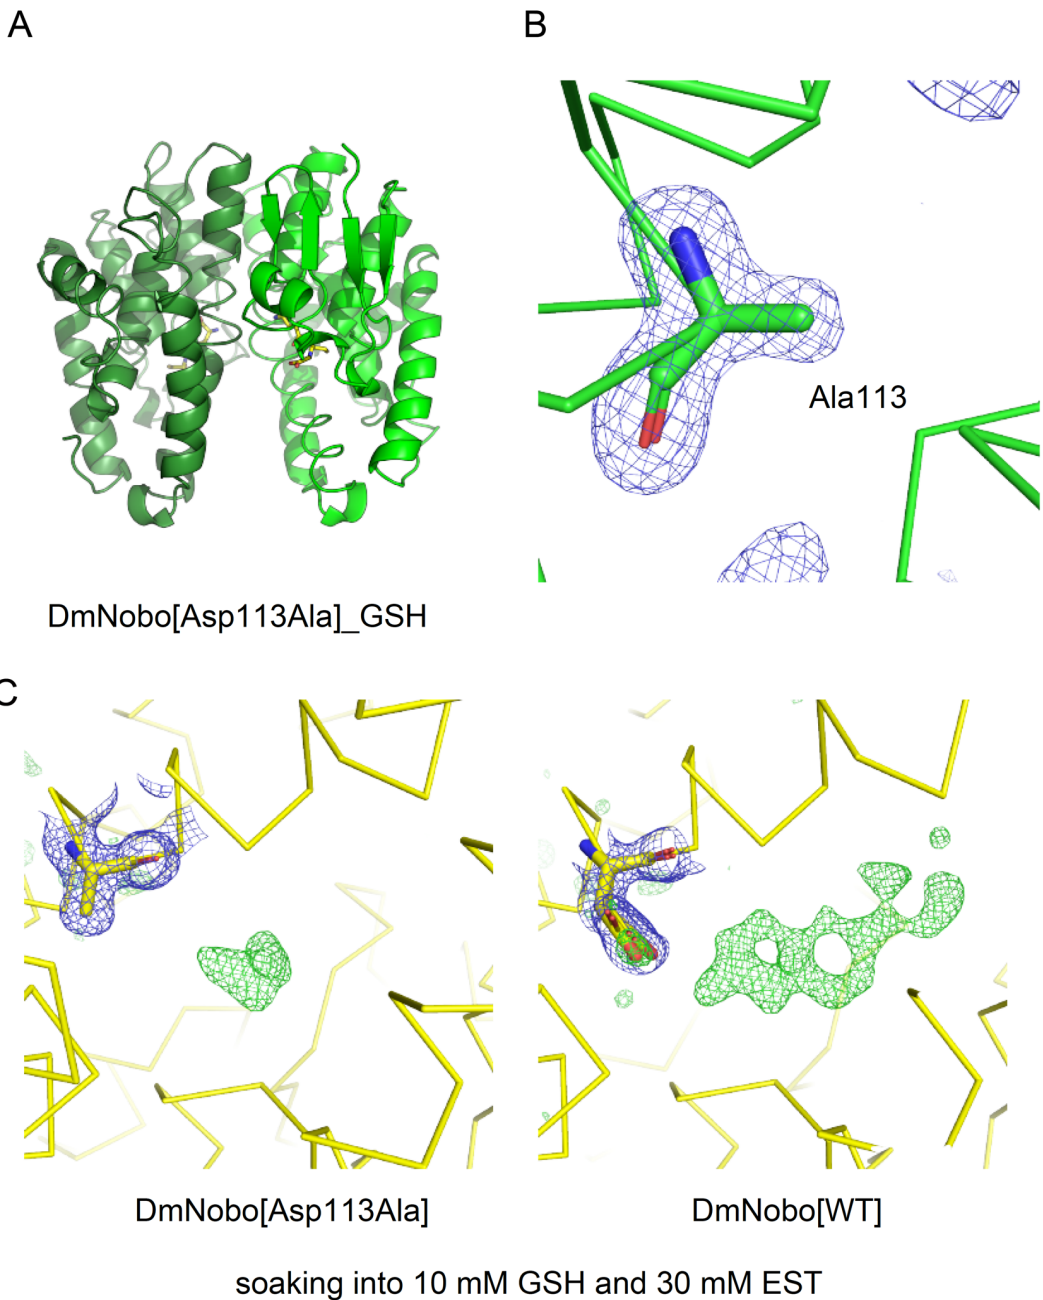

**Fig. S5. Characterization of the DmNobo[Asp113Ala] protein.**

(A) Overall structure of GSH in complex with DmNobo[Asp113Ala] (DmNobo[Asp113Ala]\_GSH). Chains A and B are shaded green and dark green, respectively. The RMSD value from the LSQ fittings between C $\alpha$  atoms in chain A of DmNobo[WT]\_GSH and those of DmNobo[Asp113Ala] was 0.1 Å.

(B) Simulated annealing-omit maps of Ala113 of DmNobo[Asp113Ala]\_GSH. *mFo*-*DFc* map (blue) contoured at 4.0 $\sigma$  was overlaid with sticks of Ala113 and a ribbon model of DmNobo[Asp113Ala]\_GSH (green). (C) *mFo*-*DFc* map around the H-sites of DmNobo[Asp113Ala] and DmNobo[WT]. EST did not bind to DmNobo[Asp113Ala]. Crystals of DmNobo[Asp113Ala] and DmNobo[WT] were soaked into an artificial mother liquor (42.5% [w/v] PPG 400 in 100 mM Bis-Tris [pH 6.4]) containing 10 mM GSH and 30 mM EST.

The  $mF_o-DFc$  maps contoured at  $4.0\sigma$  (green mesh) and the  $2mF_o-DFc$  map contoured at  $1.5\sigma$  around residue 113 (within 5 Å from residue 113, blue mesh) are shown.



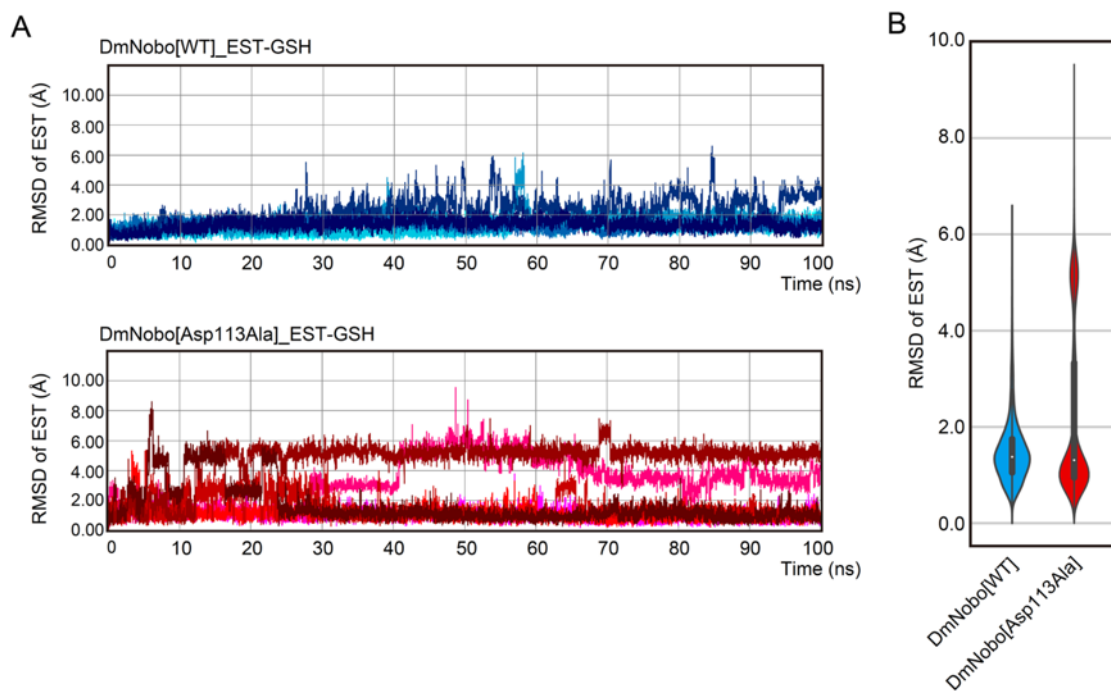

**Fig. S6. *In silico* evaluation of the contribution of Asp113 to the interaction between DmNobo and EST.**

(A) The RMSD values of EST in DmNobo[WT] (top) or DmNobo[Asp113Ala] (bottom) in triplicate independent calculations. All protein frames were aligned based on the protein backbone of the initial structure. The RMSD (Å) of EST between EST at the initial frame and each subsequent frame is plotted. (B) Violin-plot of the RMSD of EST in DmNobo[WT] or DmNobo[Asp113Ala]. The median, interquartile range, and 95% confidence interval are shown with a white dot, a bold line, and a narrow line, respectively. The width of the plot indicates the frequency of the frames.

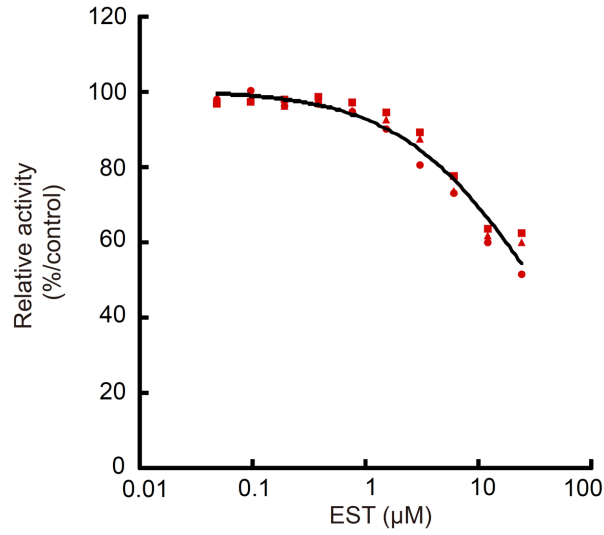

**Fig. S7. EST-dependent inhibition of the GSH-conjugation activities of AgNobo[Asp111Ala].**

3,4-DNADCF was used as an artificial fluorescent substrate. Relative activity is defined as the ratio of activity when compared to the protein without EST. All of the data points in triplicate assays are indicated. The value of  $IC_{50}$  was  $>25 \mu M$ .

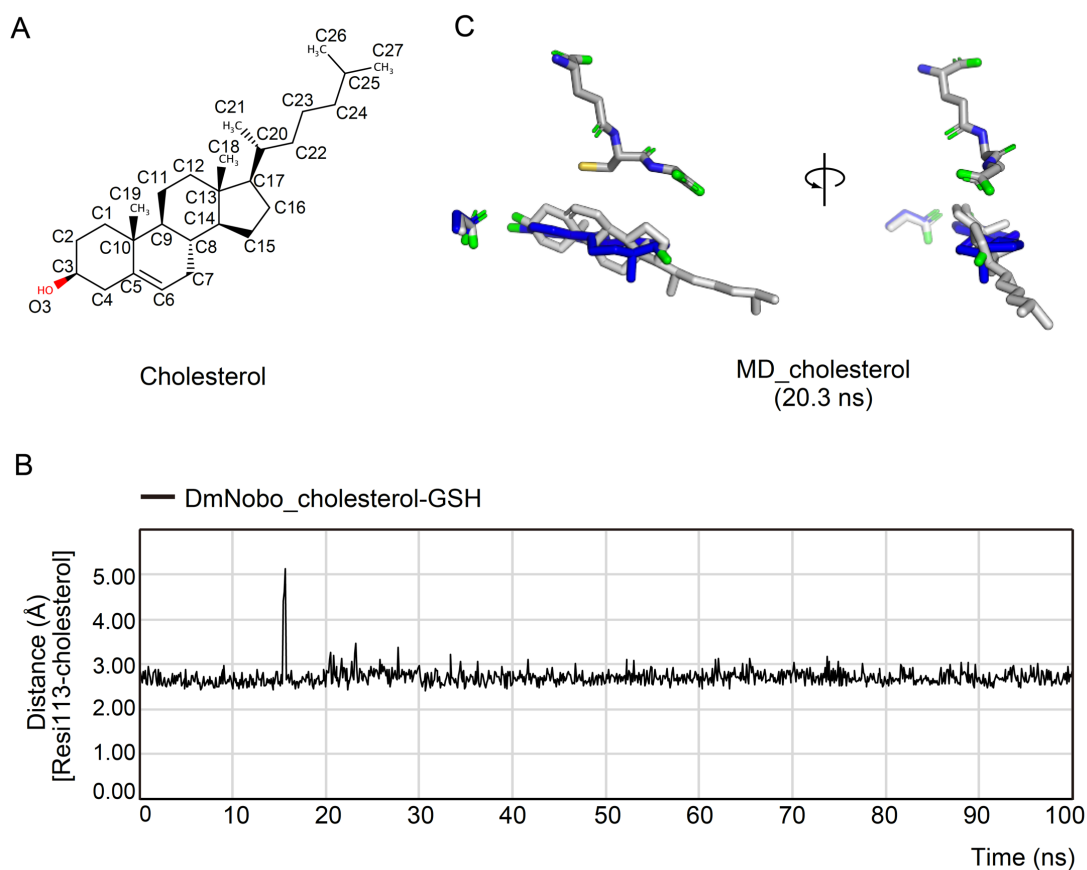

**Fig. S8. *In silico* evaluation of interaction between DmNobo and cholesterol**

(A) Chemical structure of cholesterol. (B) MD-simulation results for DmNobo in complex with cholesterol and GSH. The distance between O $\delta$  of Asp113 of DmNobo and O3 of cholesterol was plotted against time. (C) MD models of DmNobo\_cholesterol-GSH and DmNobo\_EST-GSH at 20.3 ns.

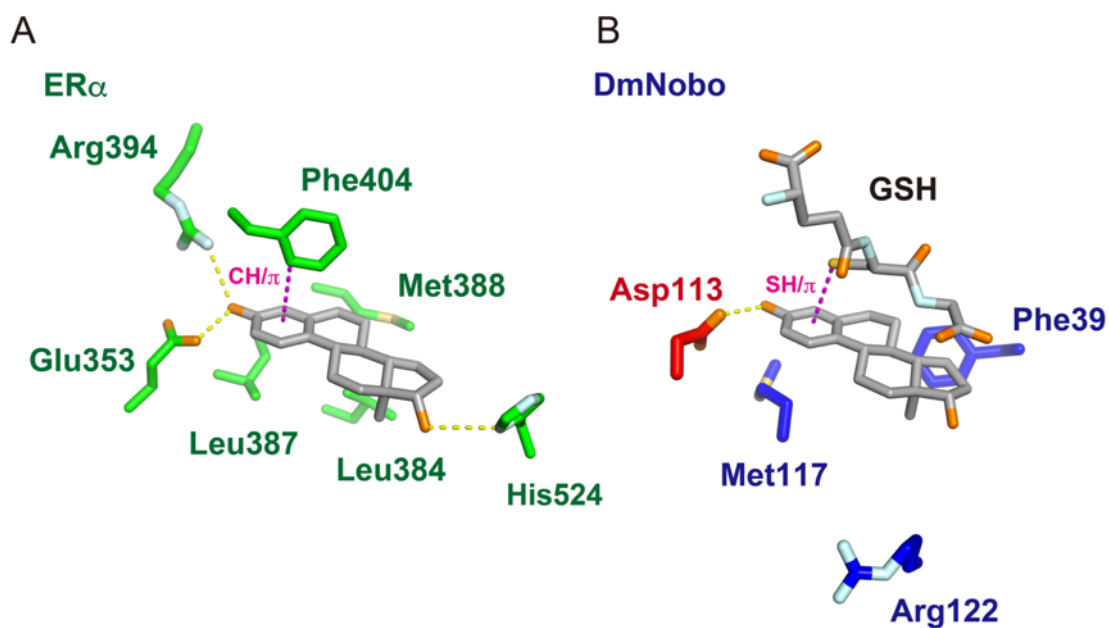

**Fig. S9. Comparison of the DmNobo\_EST and ER $\alpha$ \_EST interactions.**

Side chains of representative residues of ER $\alpha$  (A) or DmNobo (B) that interact with EST are represented with sticks (PDB ID for ER $\alpha$  structure = 1QKT). A hydrogen bond between the protein and EST is indicated with a yellow dashed line. A CH/ $\pi$  interaction between Phe404 and EST or an SH/ $\pi$  interaction between GSH and EST is indicated with a pink dashed line.

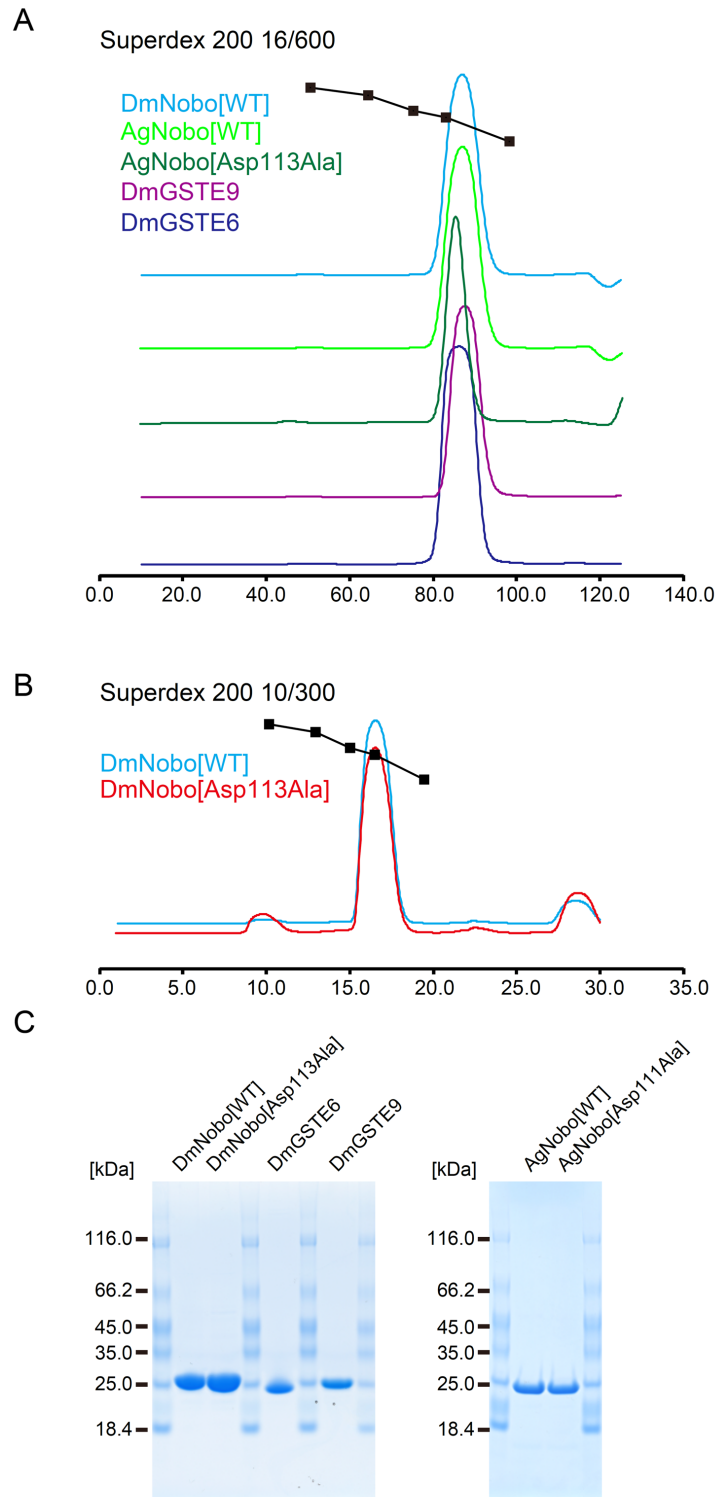

**Fig. S10. Purified proteins in this study**

(A) DmNobo[WT], DmGSTE6, DmGSTE9, AgNobo[WT] and AgNobo[Asp111Ala] were purified by size exclusion column chromatography with HiLoad Superdex 200 16/600 (GEhealthcare). UV charts of DmNobo[WT] (cyan), AgNobo[WT] (light green), AgNobo[Asp111Ala] (dark green), DmGSTE6 (blue), and DmGSTE9 (purple) are shown together with peak points of marker proteins. The marker proteins used were  $\beta$ -amylase from sweet potato (223.8 kDa), alcohol dehydrogenase from *Saccharomyces cerevisiae* (146.8

kDa), bovine serum albumin (66.5 kDa), human GSTP1-1 (46.7 kDa in solution), and RNase A (13.7 kDa).

(B) DmNobo[Asp113Ala] was purified by size exclusion column chromatography with Superdex 200 increase 10/300 (GEhealthcare). UV charts of DmNobo[Asp113Ala] (red) and DmNobo[WT] (cyan) as a control are shown together with peak points of the marker proteins. (C) SDS-PAGE analyses for DmNobo[WT], DmNobo[Asp113Ala], DmGSTE6, DmGSTE9, AgNobo[WT] and AgNobo[Asp111Ala]. Purified proteins were fractionated by SDS-PAGE in reduced condition, and stained by Coomassie Brilliant Blue G-250.

GATGTTCCGCCCTGGGCAGCAGTCTCAATTGGCGCGAGAGGTACATTGTTTAGCGG  
GCTGGACACAAATCAACTTGATTTTCAGTAATAAAACCAAGAAAATTAATGTTT  
TTCTGGTTAAGTGGGGAAAAATGCAGGTGCTTCTTCTGTCCAGAAAGTGTGGC  
CGATCAGCTGAGTCTAACAGTCCGGTTAACAGTGC GTTATAGTATGTCGTTTTCCA  
GCACTACATCAGGGATACCACACAAATTGAAAAATGAGCGCCAAATTTAAAATG  
ACTTCGTTATCTATCTTATCAATTTCAATTTCCATAGATCTGTACTTTTGGTGAAA  
GTGAACAGTGTTTATATATTTGATTTTAATAACAATTAATTGATGAATTATCTC  
GTAGTATACATTAATAATGCCACCATCAATCAGTACTGTGGCTACAAATGCTTTTC  
AATTCAGTTACTGATCGACTTTCAAGGCGTTCGTTTGTCTGTTTTTCTACCTGATCC  
TAACTTAATGGATTACAAGGATCACGATGGCGACTACAAGGACCATGACATCGA  
CTATAAGGACGACGACGATAAGGGATCCATCCATATGACGTTCCAGATTACGCT  
ATGTCTCAGCCCAAGCCGATTTTGTATTATGATGAGCGCAGCCACCAGTCCGCA  
GTTGCCATTATGCTAATCAAATTGCTCGATATAGATGTGGAGCTCAGGTTTGTGAAT  
CTCTTCAAGGGCGAGCAATTCCAAAAAGATTTCTTAGCGTAAGTAAGTCAAATT  
TATCAATGAATAAATTGAATCAATCATTATTTAAGAAAACGAATAATTTAATTI  
GCGAAAATTCCTTATAATTATAATTTCTGTTTTATATTTTGCCATTTTATTTAGTT  
AAATCCCAGCACAGTGTCCCACCCTAGTCCACGGTGATCTGGTGCTGACGGAC  
AGTCATGCTATACTCATTACCTGGCGGAGAAGTTCGATGAGGGCGGTAGTTTGT  
GGCCGAGGAGCACGCAGAACGGATGAAGGTTCTGAACCTCCTGCTTTCGAGTG  
CTCCTTTTGTTCGACGTGACAGTATTTATG GTGGGTGATTGCAACTAAAAC  
TAGCTGTTTACATAATTTGTTTTTATTTTCCAGTCGGCGACTGGCGCTCTTCC  
GCTTCTCGCTACTGACTCGCTGCGCTCGGTTCGCTGCGGCGAGCGGTATC  
AGTCACTCAAAGGCGGTAATACGGTTATCCACAGAATCAGGGGATAACGCAGG  
AAAGAACATGTGAGCAAAGGCCAGCAAAGGCCAGGAACCGTAAAAAGGCCG  
CGTTGCTGGCGTTTTTCCATAGGCTCCGCCCCCTGACGAGCATCACAAAATCG  
ACGCTCAAGTCAGAGGTGGCGAAACCCGACAGGACTATAAAGATACCAGGCGTT  
TCCCCCTGGAAGCTCCCTCGTGCGCTCTCCTGTTCCGACCCTGCCGCTTACCGGAT  
ACCTGTCCGCCTTTCTCCCTTCGGGAAGCGTGGCGCTTCTCATAGCTCACGCTGT  
AGGTATCTCAGTTCGGTGTAGGTCGTTTCGCTCCAAGCTGGGCTGTGTGCACGAAC  
CCCCGTTACGCCGACCGCTGCGCCTTATCCGGTAACTATCGTCTTGAGTCCAAC  
CCGGTAAGACACGACTTATCGCCACTGGCAGCAGCCACTGGTAACAGGATTAGC  
AGAGCGAGGTATGTAGGCGGTGCTACAGAGTTCTTGAAGTGGTGGCCTAACTACG  
GCTACACTAGAAGAACAGTATTTGGTATCTGCGCTCTGCTGAAGCCAGTTACCTT  
CGAAAAAAGAGTTGGTAGCTCTTGATCCGGCAAACAACCACCGCTGGTAGCGG  
TGTTTTTTTTGTTTGAAGCAGCAGATTACGCGCAGAAAAAAGGATCTCAAGAA  
GATCCTTTGATCTTTTCTACGGGTCTGACGCTCAGTGGAACGAAAACCTCACGTT  
AAGGGATTTTGGTCATGAGATTATCAAAAAGGATCTTCACCTAGATCCTTTTAAA  
TTAAAATGAAGTTTTAAATCAATCTAAAGTATATATGAGTAAACTTGGTCTGAC  
AGTTACCAATGCTTAATCAGTGAGGCACCTATCTCAGCGATCTGTCTATTTCTGTT  
ATCCATAGTTGCCTGACTCCCCGTCGTGTAGATAACTACGATACGGGAGGGCTTA  
CCATCTGGCCCCAGTGCTGCAATGATACCGCGAGATCCACGCTCACCGGCTCCAG  
ATTTATCAGCAATAAACCAGCCAGCCGGAAGGGCCGAGCGCAGAAGTGGTCTG  
CAACTTTATCCGCTCCATCCAGTCTATTAATTGTTGCCGGGAAGCTAGAGTAAGT  
AGTTCGCCAGTTAATAGTTTGCGCAACGTTGTTGCCATTGCTACAGGCATCGTGGT  
GTCACGCTCGTCTGTTGGTATGGCTTCATTCAGCTCCGGTCCCAACGATCAAGGC  
GAGTTACATGATCCCCCATGTTGTGCAAAAAAGCGGTTAGCTCCTTCGGTCTCTCC  
GATCGTTGTCAGAAGTAAGTTGGCCGAGTGTATCACTCATGGTTATGGCAGCA  
CTGCATAATTCTTACTGTCATGCCATCCGTAAGATGCTTTTCTGTGACTGGTGA  
GACTCAACCAAGTCATTCTGAGAATAGTGTATGCGGCGACCGAGTTGCTCTTGC  
CCGGCGTCAATACGGGATAAATACCGCGCCACATAGCAGAACTTTAAAAGTGCTCA  
TCATTGGAACGTTCTTCGGGGCGAAAACCTCTCAAGGATCTTACCGCTGTTGAG  
ATCCAGTTCGATGTAACCCACTCGTGCACCCAACTGATCTTCAGCATCTTTTACTT  
TCACCAGCGTTTCTGGGTGAGCAAAAACAGGAAGGCAAAAATGCCGCAAAAAGG  
GAATAAGGGCGACACGGAAATGTTGAATACTCATACTCTTCTTTTCAATATTAT  
TGAAGCATTATCAGGGTATTGTCTCATGAGCGGATACATATTTGAATGATTTA

GAAAAATAAACAAATAGGGGTTCCGCGCACATTTCCCCGAAAAGTGCCACCTGA  
CGTCTAAGAAACCATTATTATCATGACATTAACCTATAAAAATAGGCGTATCACG  
AGGCCCTTTCGTC

**Fig. S11.**

**DNA sequence of pDonor[KI]-{CG4688\_LA};{3×FLAG/HA/nobo};{CG4688\_RA}**

Gray highlighting: 5' homology arm; blue highlighting: ATG + 3× FLAG tag; yellow highlighting: HA tag; magenta highlighting: exons of Nobo (CG4688); green highlighting: introns of Nobo (CG4688); underlined text: pUC19 ori



GATGTTCCGCCCTGGGCAGCAGTCTCAATTGGCGCGAGAGGTACATTGTTTAGCGG  
GCTGGACACAAATCAACTTGATTTTCAGTAATAAAACCAAGAAAATTAATGTTT  
TTCTGGTTAAAGTGGGGAAAAATGCAGGTGCTTCTTCTGTCCAGAAAGTGTGGC  
CGATCAGCTGAGTCTAACAGTCCGGTTAACAGTGC GTTATAGTATGTCGTTTTCCA  
GCACTACATCAGGGATACCACACAAATTGAAAAATGAGCGCCAAATTTAAAATG  
ACTTCGTTATCTATCTTATCAATTTCAATTTCCATAGATCTGTA CTTTGGTGAAA  
GTGAACAGTGT TATATATTTGATTTTAATAACAATTAATTGATGAATTATCTC  
GTAGTATACATTA AAAATGCCACCATCAATCAGTACTGTGGCTACAAATGCTTTTC  
AATTCAGTTACTGATCGACTTTCAAGGCGTTCGTTTGTCTGTTTTTCTACCTGATCC  
TAACTTAATGGATTACAAGGATCACGATGGCGACTACAAGGACCATGACATCGA  
CTATAAGGACGACGACGATAAGGGATCCATCCATATGACGTTCCAGATTACGCT  
ATGTCTCAGCCCAAGCCGATTTTGTATTATGATGAGCGCAGCCACCAGTCCGCA  
GTTGCCATTATGCTAATCAAATTGCTCGATATAGATGTGGAGCTCAGGTTTGTGAAT  
CTCTTCAAGGGCGAGCAATTCCAAAAAGATTTCTTAGCGTAAGTAAGTCAAATT  
TATCAATGAATAAATTGAATCAATCATTATTTAAGAAAACGAATAATTTAATTI  
GCGAAAATTCCTTATAATTATAATTTCTGTTTTATATTTTGCCATTTTATTTAGTT  
AAATCCCCAGCACAGTGTCCCACCCTAGTCCACGGTGATCTGGTGCTGACGGAC  
AGTCATGCTATACTCATTACCTGGCGGAGAAGTTCGATGAGGGCGGTAGTTTGT  
GGCCG CAGGAGCACGCAGAACGGATGAAGGTTCTGAACCTCCTGCTTTCGAGTG  
CTCCTTTTTGTTCCGACGTGCCAGCGACTTCATGTTGGGTGATTCCGCAACTAAAA  
CTAGCTGTTTACATATTTTGTTTTTTATTTTTCCAGTCGGCGACTGTCCGCCAGGG  
ATTCGCCAATGTCGATGTGGCACATCATGAACGCAAGCTGACCGAGGCGTATATT  
ATCATGGAGCGTTACCTGAAAAATAGCGATTTTATGGCCGGGCCACAGGTAAAA  
AAAGACCAGCTCATCTGATTGCGATTCCCTGTCGTTGTGGCGGCTCAATTAAGTCT  
AGAATTCACCTTTGTTTCCGCGGTTTCAGCTGACGCTCGCCGACTTATCCATCGT  
GACCACATTGAGCACCGTCAATCTCATGTTTCCCCTGTCGCAGTTCCCACGTCTGC  
GGCGCTGGTTCACCGCGATGCAGCAGCTGGATGCCTACGAGGCCAACTGCAGTG  
GCTTGGAGAAGCTCCGCCAAACGATGGAGAGCGTCCGGTAGCTTTCAGTTCCCATC  
GTCATCAGCGGTAGTCACCGAGAAGGTGGAGTAGGGCGTCTTCCGCTTCCCTCGC  
TCACTGACTCGCTGCGCTCGGTCGTTCCGGCTGCGGCGAGCGGTATCAGCTCACTC  
AAAGGCGGTAATACGGTTATCCACAGAATCAGGGGATAACGCAGGAAAGAACAT  
GTGAGCAAAAGGCCAGCAAAAGGCCAGGAACCGTAAAAAGGCCGCGTTGCTGGC  
GTTTTTCCATAGGCTCCGCCCCCTGACAGCATCACAAAAATCGACGCTCAAGT  
CAGAGGTGGCGAAACCCGACAGGACTATAAAGATACCAGGCGTTTCCCCCTGGA  
AGCTCCCTCGTGCCTCTCCTGTTCCGACCCTGCCGTTACCGGATACCTGTCCGC  
CTTCTCCCTTCGGGAAGCGTGGCGCTTTCATAGCTCACGCTGTAGGTATCTCA  
GTTCCGGTGTAGGTCGTTTCGCTCCAAGCTGGGCTGTGTGCACGAACCCCCGTTCA  
GCCCCACCGCTGCGCCTTATCCGTA ACTATCGTCTTGAGTCCAACCCGGTAAGA  
CACGACTTATCGCCACTGGCAGCAGCCACTGGTAAACAGGATTAGCAGAGCGAGG  
TATGTAGGCGGTGCTACAGAGTTCTTGAAGTGGTGGCCTAACTACGGCTACACTA  
GAAGAACAGTATTTGGTATCTGCGCTCTGCTGAAGCCAGTTACCTTCGGAAAAAG  
AGTTGGTAGCTCTTGATCCGGCAAACAACCACCGCTGGTAGCGGTGGTTTTTTTT  
GTTTGCAAGCAGCAGATTACGCGCAGAAAAAAGGATCTCAAGAAGATCCTTTG  
ATCTTTTCTACGGGTCTGACGCTCAGTGGAACGAAA ACTCACGTTAAGGGATTT  
TGGT CATGAGATTATCAAAAAGGATCTTCACCTAGATCCTTTTAAATTA AAAATG  
AAGTTTTAAATCAATCTAAAGTATATATGAGTAAACTTGGTCTGACAGTTACCAA  
TGCTTAATCAGTGAGGCACCTATCTCAGCGATCTGTCTATTTTCGTT CATCCATAGT  
TGCCTGACTCCCCGTCGTGTAGATAACTACGATACGGGAGGGCTTACCATCTGGC  
CCCAGTGCTGCAATGATACCGCGAGATCCACGCTCACCGGCTCCAGATTTATCAG  
CAATAAACAGCCAGCCGGAAGGGCCGAGCGCAGAAGTGGTCTGCAACTTTAT  
CCGCCTCCATCCAGTCTATTAATTGTTGCCGGGAAGCTAGAGTAAGTAGTTCCGC  
AGTTAATAGTTTGCACAACGTTGTTGCCATTGCTACAGGCATCGTGGTGTACAGCT  
CGTCGTTTGGTATGGCTTCATTCAGCTCCGGTTCCCAACGATCAAGGCGAGTTAC  
ATGATCCCCATGTTGTGCAAAAAGCGGTTAGCTCCTTCGGTCTCCGATCGTTG  
TCAGAAGTAAGTTGGCCGAGTGTATCACTCATGGTTATGGCAGCACTGCATAA

TTCTCTTACTGTCATGCCATCCGTAAGATGCTTTTCTGTGACTGGTGAGTACTCAA  
CCAAGTCATTCTGAGAATAGTGTATGCGGCGACCGAGTTGCTCTTGCCCGGCGTC  
AATACGGGATAATACCGCGCCACATAGCAGAACTTTAAAAGTGCTCATCATTGGA  
AAACGTTCTTCGGGGCGAAAACCTCTCAAGGATCTTACCGCTGTTGAGATCCAGTT  
CGATGTAACCCACTCGTGCACCCAACCTGATCTTCAGCATCTTTTACTTTCACCAGC  
GTTTCTGGGTGAGCAAAAACAGGAAGGCAAAATGCCGCAAAAAAGGGAATAAG  
GGCGACACGGAAATGTTGAATACTCATACTCTTCCTTTTCAATATTATTGAAGCA  
TTTATCAGGGTTATTGTCTCATGAGCGGATACATATTTGAATGTATTTAGAAAAAT  
AAACAAATAGGGGTTCCGCGCACATTTCCCGAAAAGTGCCACCTGACGTCTAAG  
AAACCATTATTATCATGACATTAACCTATAAAAAATAGGCGTATCACGAGGCCCTT  
TCGTC

**Fig. S12.**

**DNA sequence of pDonor[KI]-**

**{CG4688\_LA};{3×FLAG/HA/nobo\*D113A};{CG4688\_RA}**

Gray highlighting: 5' homology arm; blue highlighting: ATG + 3× FLAG tag; yellow highlighting: HA tag; magenta highlighting: exons of Nobo (CG4688); green highlighting: introns of Nobo (CG4688); boxed and bold text: substitution with Ala (GAC → GCC); underlined text: pUC19 ori

**Table S1. Crystallographic Summary of DmNobo crystal structures**

|                                    | DmNobo_Apo                                      | DmNobo_GSH                                      | DmNobo_EST                                      | DmNobo_ES<br>T-GSH                              |
|------------------------------------|-------------------------------------------------|-------------------------------------------------|-------------------------------------------------|-------------------------------------------------|
| Data Collection                    |                                                 |                                                 |                                                 |                                                 |
| Space group                        | <i>P2<sub>1</sub>2<sub>1</sub>2<sub>1</sub></i> | <i>P2<sub>1</sub>2<sub>1</sub>2<sub>1</sub></i> | <i>P2<sub>1</sub>2<sub>1</sub>2<sub>1</sub></i> | <i>P2<sub>1</sub>2<sub>1</sub>2<sub>1</sub></i> |
| Cell Dimensions                    |                                                 |                                                 |                                                 |                                                 |
| <i>a</i> , <i>b</i> , <i>c</i> (Å) | 59.12, 76.56<br>106.36                          | 58.75, 75.67,<br>107.84                         | 58.40, 75.08,<br>109.02                         | 58.38, 75.06,<br>108.52                         |
| $\alpha$ , $\beta$ , $\gamma$ (°)  | 90.00, 90.00,<br>90.00                          | 90.00, 90.00,<br>90.00                          | 90.00, 90.00,<br>90.00                          | 90.00, 90.00,<br>90.00                          |
| Resolution* (Å)                    | 42.83 - 1.50<br>(1.55 - 1.50)                   | 46.42 - 1.75<br>(1.81 - 1.75)                   | 46.12 - 1.58<br>(1.64 - 1.58)                   | 46.11 - 1.55<br>(1.61 - 1.55)                   |
| <i>R</i> <sub>merge</sub>          | 0.045<br>(0.38)                                 | 0.082<br>(1.05)                                 | 0.048<br>(0.84)                                 | 0.038<br>(0.36)                                 |
| <i>I</i> / $\sigma$ <i>I</i>       | 33.8<br>(6.53)                                  | 27.3<br>(2.3)                                   | 37.6<br>(2.6)                                   | 42.7<br>(3.3)                                   |
| Completeness                       | 1.00<br>(1.00)                                  | 1.00<br>(0.97)                                  | 0.87<br>(0.47)                                  | 0.95<br>(0.69)                                  |
| Redundancy                         | 13.1<br>(12.7)                                  | 14.3<br>(12.2)                                  | 14.1<br>(10.6)                                  | 12.3<br>(3.8)                                   |
| CC1/2                              | 1.00<br>(0.97)                                  | 1.00<br>(0.75)                                  | 1.00<br>(0.76)                                  | 1.00<br>(0.84)                                  |
| Refinement                         |                                                 |                                                 |                                                 |                                                 |
| Resolution (Å)                     | 42.83 - 1.50                                    | 35.70 - 1.75                                    | 35.49 - 1.70                                    | 32.59 - 1.55                                    |
| No. of reflections                 | 77,842                                          | 49,095                                          | 51,170                                          | 65,906                                          |
| <i>R</i> <sub>work</sub>           | 0.164                                           | 0.173                                           | 0.176                                           | 0.161                                           |
| <i>R</i> <sub>free</sub>           | 0.195                                           | 0.207                                           | 0.211                                           | 0.182                                           |
| No. of Atoms                       |                                                 |                                                 |                                                 |                                                 |
| Protein                            | 3,880                                           | 3,609                                           | 3,687                                           | 3,817                                           |
| GSH                                | 0                                               | 40                                              | 0                                               | 40                                              |
| EST                                | 0                                               | 0                                               | 40                                              | 40                                              |
| Water                              | 643                                             | 408                                             | 403                                             | 499                                             |
| <i>B</i> factors                   |                                                 |                                                 |                                                 |                                                 |
| Protein                            | 22.0                                            | 22.0                                            | 23.5                                            | 20.1                                            |
| GSH                                | -                                               | 17.7                                            | -                                               | 15.5                                            |
| EST                                | -                                               | -                                               | 31.5                                            | 20.8                                            |
| Waters                             | 39.5                                            | 33.7                                            | 34.5                                            | 34.7                                            |
| RMSD                               |                                                 |                                                 |                                                 |                                                 |
| Bond length (Å)                    | 0.008                                           | 0.007                                           | 0.008                                           | 0.010                                           |
| Bond angles (°)                    | 0.98                                            | 0.89                                            | 0.96                                            | 1.19                                            |
| Ramachandran plot (%)              |                                                 |                                                 |                                                 |                                                 |
| favored                            | 99.1                                            | 99.3                                            | 98.9                                            | 99.3                                            |
| allowed                            | 0.90                                            | 0.68                                            | 1.14                                            | 0.68                                            |
| outliers                           | 0.00                                            | 0.00                                            | 0.00                                            | 0.00                                            |
| PDB ID                             | 6KEM                                            | 6KEN                                            | 6KEO                                            | 6KEP                                            |

Each structure was determined from diffraction data from one crystal. PDB, Protein Data Bank; RMSD, root-mean-square deviation. \*Highest resolution shells are shown in parentheses.

**Table S1. Crystallographic Summary of DmNobo crystal structures *Continued***

|                                    | DmNobo[Asp113Ala]<br>Apo                        | DmNobo[Asp113Ala]<br>GSH                        |
|------------------------------------|-------------------------------------------------|-------------------------------------------------|
| Data Collection                    |                                                 |                                                 |
| Space group                        | <i>P2<sub>1</sub>2<sub>1</sub>2<sub>1</sub></i> | <i>P2<sub>1</sub>2<sub>1</sub>2<sub>1</sub></i> |
| Cell Dimensions                    |                                                 |                                                 |
| <i>a</i> , <i>b</i> , <i>c</i> (Å) | 58.72, 75.48, 107.11                            | 58.37, 74.83, 107.42                            |
| $\alpha$ , $\beta$ , $\gamma$ (°)  | 90.00, 90.00, 90.00                             | 90.00, 90.00, 90.00                             |
|                                    | 46.34 - 1.84                                    | 46.03 - 1.84                                    |
| Resolution* (Å)                    | (1.90 - 1.84)                                   | (1.90 - 1.84)                                   |
| <i>R</i> <sub>merge</sub>          | 0.072 (1.10)                                    | 0.113 (1.12)                                    |
| <i>I</i> / $\sigma$ <i>I</i>       | 21.3 (2.1)                                      | 15.2 (2.12)                                     |
| Completeness                       | 1.00 (0.99)                                     | 99.9 (99.5)                                     |
| Redundancy                         | 13.3 (13.8)                                     | 13.5 (13.9)                                     |
| CC1/2                              | 1.00 (0.83)                                     | 1.00 (0.78)                                     |
| Refinement                         |                                                 |                                                 |
| Resolution (Å)                     | 46.34 - 1.84                                    | 46.03 - 1.84                                    |
| No. reflections                    | 42,099                                          | 41,768                                          |
| <i>R</i> <sub>work</sub>           | 0.208                                           | 0.189                                           |
| <i>R</i> <sub>free</sub>           | 0.240                                           | 0.221                                           |
| No. of Atoms                       |                                                 |                                                 |
| Protein                            | 3,495                                           | 3,529                                           |
| GSH                                | 0                                               | 40                                              |
| EST                                | 0                                               | 0                                               |
| Water                              | 174                                             | 146                                             |
| <i>B</i> factors                   |                                                 |                                                 |
| Protein                            | 33.51                                           | 21.9                                            |
| GSH                                | -                                               | 18.1                                            |
| EST                                | -                                               | -                                               |
| Waters                             | 36.85                                           | 26.5                                            |
| RMSD                               |                                                 |                                                 |
| Bond length (Å)                    | 0.005                                           | 0.004                                           |
| Bond angles (°)                    | 0.73                                            | 0.66                                            |
| Ramachandran plot (%)              |                                                 |                                                 |
| favored                            | 99.0                                            | 99.1                                            |
| allowed                            | 0.91                                            | 0.91                                            |
| outliers                           | 0.00                                            | 0.00                                            |
| PDB                                |                                                 |                                                 |
| ID                                 | 6KEQ                                            | 6KER                                            |

**Table S2. root-mean-square deviation (RMSD) among DmNobo crystal structures**

|                |                                      | RMSD (Å) of C $\alpha$ atoms of chain A <sup>†</sup> /<br>RMSD (Å) of C $\alpha$ atoms of chains A and B <sup>‡</sup> |             |                    |
|----------------|--------------------------------------|-----------------------------------------------------------------------------------------------------------------------|-------------|--------------------|
|                | Coordinate<br>error (Å) <sup>*</sup> | DmNobo_GSH                                                                                                            | DmNobo_EST  | DmNobo_EST-<br>GSH |
| DmNobo_Apo     | 0.13                                 | 0.20 / 0.35                                                                                                           | 0.26 / 0.42 | 0.48 / 0.55        |
| DmNobo_GSH     | 0.20                                 |                                                                                                                       | 0.16 / 0.24 | 0.42 / 0.36        |
| DmNobo_EST     | 0.21                                 |                                                                                                                       |             | 0.40 / 0.32        |
| DmNobo_EST-GSH | 0.15                                 |                                                                                                                       |             |                    |

<sup>\*</sup> Coordinate errors are estimated by a maximum-likelihood method.

<sup>†</sup> Number of aligned C $\alpha$  atoms in chain A: 199 atoms

<sup>‡</sup> Number of aligned C $\alpha$  atoms in chain A and B: 391 atoms

**Table S3. Summary of H-site-composing, or EST-interacting atoms in DmNobo**

\* Atoms of DmNobo within 4.0 Å from EST.

† Atoms of EST within 4.0 Å from each EST-interacting atom.

| Residue | H-site-composing atoms | EST-interacting atoms* | DmNobo-interacting atoms† | Distance ‡ (Å) | Identity among DmGST D/E/T | Identity among Nobo | Total IFIE to EST (kcal/mol) |
|---------|------------------------|------------------------|---------------------------|----------------|----------------------------|---------------------|------------------------------|
| Arg13   | C, Cβ                  | -                      | -                         | -              | 0.07                       | 0.05                | -0.31                        |
| Ser14   | Cα, N, Cβ              | -                      | -                         | -              | 0.85                       | 1.00                | -1.78                        |
| Pro15   | Cδ, Cγ                 | Cδ                     | O3                        | 3.2            | 0.62                       | 1.00                | -3.93                        |
|         |                        | Cδ                     | C3                        | 3.6            |                            |                     |                              |
|         |                        | Cδ                     | C4                        | 3.7            |                            |                     |                              |
|         |                        | Cγ                     | O3                        | 3.1            |                            |                     |                              |
| Leu38   | C, O, Cβ, Cδ           | Cβ                     | C15                       | 4.0            | 0.61                       | 1.00                | -1.86                        |
|         |                        | Cδ                     | C7                        | 4.0            |                            |                     |                              |
| Phe39   | Cα, Cδ, Cγ, Cε, Cζ     | Cε1                    | C6                        | 3.9            | 0.07                       | 1.00                | -6.77                        |
|         |                        |                        | C7                        | 3.7            |                            |                     |                              |
|         |                        | π                      | C15                       | 3.9            |                            |                     |                              |
| Gln43   | Nε                     | -                      | -                         | -              | 0.21                       | 0.05                | -0.51                        |
| Phe110  | Cε, Cζ                 | Cε                     | C2                        | 4.0            | 0.42                       | 1.00                | -2.79                        |
| Asp113  | Oδ                     | Oδ                     | O3                        | 2.6            | 0.01                       | 0.95                | -41.4                        |
| Ser114  | Cα, Cβ                 | Cα                     | C1                        | 3.8            | 0.10                       | 0.76                | -2.17                        |
|         |                        | Cα                     | C2                        | 3.8            |                            |                     |                              |
|         |                        | Cβ                     | C1                        | 3.9            |                            |                     |                              |
| Met117  | Cβ, Cγ, Cε             | Cβ                     | C1                        | 3.9            | 0.04                       | 0.40                | -3.52                        |
|         |                        | Cβ                     | C2                        | 3.9            |                            |                     |                              |
|         |                        | Cγ                     | C2                        | 3.8            |                            |                     |                              |
|         |                        | Cγ                     | C3                        | 3.9            |                            |                     |                              |
| Ser118  | Cα, N, Cβ, Cγ          | -                      | -                         | -              | 0.06                       | 0.33                | -3.25                        |
| Val121  | Cβ, Cγ1, Cγ2           | Cβ                     | C18                       | 3.9            | 0.11                       | 0.05                | -1.63                        |
|         |                        | Cγ1                    | C18                       | 3.9            |                            |                     |                              |
|         |                        | Cγ2                    | C18                       | 3.8            |                            |                     |                              |
| Arg122  | Cβ                     | -                      | -                         | -              | 0.07                       | 0.14                | -1.49                        |
| Thr172  | Cγ                     | Cγ                     | O3                        | 3.3            | 0.31                       | 0.52                | 0.026                        |
| Leu208  | Cδ1, Cδ2               | Cδ1                    | C4                        | 3.9            | 0.31                       | 0.95                | -2.17                        |
|         |                        | Cδ1                    | C6                        | 3.8            |                            |                     |                              |
|         |                        | Cδ2                    | O3                        | 4.0            |                            |                     |                              |
|         |                        | Cδ2                    | C4                        | 3.9            |                            |                     |                              |
| Met212  | Sδ                     | -                      | -                         | -              | 0.05                       | 0.95                | -0.65                        |
| GSH     | Cys_Cβ, Cys_Sγ         | Cys_Sγ                 | π                         | 3.7            | -                          | -                   | -3.48                        |

‡ Average of chains A and B in the asymmetric unit.

**Table S4. FMO analysis between fragments in DmNobo and EST**

| Residue | Total      | ES         | EX         | CT         | DI         |
|---------|------------|------------|------------|------------|------------|
|         | [kcal/mol] | [kcal/mol] | [kcal/mol] | [kcal/mol] | [kcal/mol] |
| Arg13   | -0.31      | 0.36       | 0.03       | -0.10      | -0.59      |
| Ser14   | -1.78      | 0.49       | 0.20       | -1.01      | -1.47      |
| Pro15   | -3.93      | -1.52      | 2.53       | -1.25      | -3.69      |
| Arg18   | -1.85      | -1.66      | 0.00       | -0.02      | -0.17      |
| Leu38   | -1.86      | -0.67      | 2.75       | -0.79      | -3.15      |
| Phe39   | -6.77      | -1.77      | 4.34       | -1.97      | -7.37      |
| Lys40   | 0.13       | 0.28       | 0.00       | 0.00       | -0.15      |
| Gln43   | -0.51      | 0.25       | 0.12       | -0.18      | -0.69      |
| Phe110  | -2.79      | -1.08      | 0.31       | -0.51      | -1.51      |
| Asp113  | -41.38     | -49.71     | 26.87      | -12.63     | -5.91      |
| Ser114  | -2.17      | -0.03      | 3.72       | -2.76      | -3.11      |
| Asp115  | 3.31       | 1.66       | 0.07       | 2.18       | -0.59      |
| Met117  | -3.52      | 0.12       | 2.12       | -1.36      | -4.39      |
| Ser118  | -3.25      | -0.41      | 0.87       | -1.05      | -2.65      |
| Ala119  | -0.36      | -0.24      | 0.03       | 0.24       | -0.39      |
| Val121  | -1.63      | -0.74      | 2.35       | -0.47      | -2.77      |
| Arg122  | -1.49      | -1.10      | 0.00       | -0.03      | -0.36      |
| Leu208  | -2.17      | -0.74      | 2.23       | -0.70      | -2.97      |
| GSH_Gly | -2.49      | 0.64       | 0.32       | -0.89      | -2.56      |
| GSH_Cys | -3.48      | -1.00      | 5.12       | -1.68      | -5.92      |
| PIEDA   | -82.4      | -59.2      | 55.8       | -25.8      | -53.1      |

**Table S5. ID of amino acid sequences used in phylogenetic analysis**

| Accession   | Description                                                                                          |
|-------------|------------------------------------------------------------------------------------------------------|
| Query_10001 | tr C4WSG3 C4WSG3_ACYPI ACYPI009122 protein OS=Acyrtosiphon pisum OX=7029 GN=ACYPI009122 PE=2 SV=1    |
| Query_10002 | tr C4WT83 C4WT83_ACYPI ACYPI008657 protein OS=Acyrtosiphon pisum OX=7029 GN=ACYPI008657 PE=2 SV=1    |
| Query_10003 | tr C4WUF9 C4WUF9_ACYPI ACYPI005620 protein OS=Acyrtosiphon pisum OX=7029 GN=ACYPI005620 PE=2 SV=1    |
| Query_10004 | tr I6SCG3 I6SCG3_ACYPI Glutathione S-transferase D5 OS=Acyrtosiphon pisum OX=7029 GN=GstD5 PE=3 SV=1 |
| Query_10005 | tr J9JLJ3 J9JLJ3_ACYPI Uncharacterized protein OS=Acyrtosiphon pisum OX=7029 PE=4 SV=2               |
| Query_10006 | tr J9K2A8 J9K2A8_ACYPI Uncharacterized protein OS=Acyrtosiphon pisum OX=7029 PE=3 SV=1               |
| Query_10007 | tr J9K372 J9K372_ACYPI Uncharacterized protein OS=Acyrtosiphon pisum OX=7029 PE=3 SV=1               |
| Query_10008 | tr J9K6N7 J9K6N7_ACYPI Uncharacterized protein OS=Acyrtosiphon pisum OX=7029 GN=100167788 PE=4 SV=1  |
| Query_10009 | tr J9M2I6 J9M2I6_ACYPI Uncharacterized protein OS=Acyrtosiphon pisum OX=7029 PE=3 SV=2               |
| Query_10010 | tr X1WJM1 X1WJM1_ACYPI Uncharacterized protein OS=Acyrtosiphon pisum OX=7029 PE=3 SV=1               |
| Query_10011 | tr Q17MA9 Q17MA9_AEDAE AAEL001061-PA OS=Aedes aegypti OX=7159 GN=GSTD1 PE=4 SV=1                     |
| Query_10012 | tr Q174V0 Q174V0_AEDAE AAEL006764-PA (Fragment) OS=Aedes aegypti OX=7159 GN=AAEL006764 PE=4 SV=1     |
| Query_10013 | tr Q17MB0 Q17MB0_AEDAE AAEL001078-PA OS=Aedes aegypti OX=7159 GN=GSTD2 PE=4 SV=1                     |
| Query_10014 | tr Q17MB7 Q17MB7_AEDAE AAEL001059-PA OS=Aedes aegypti OX=7159 GN=GSTD3 PE=3 SV=1                     |
| Query_10015 | tr Q17MB8 Q17MB8_AEDAE AAEL001054-PA (Fragment) OS=Aedes aegypti OX=7159 GN=GSTD4 PE=4 SV=2          |
| Query_10016 | tr Q17MB1 Q17MB1_AEDAE AAEL001071-PA OS=Aedes aegypti OX=7159 GN=GSTD5 PE=4 SV=1                     |
| Query_10017 | tr Q16SH6 Q16SH6_AEDAE AAEL010591-PA OS=Aedes aegypti OX=7159 GN=GSTD6 PE=3 SV=1                     |
| Query_10018 | tr Q17MA8 Q17MA8_AEDAE AAEL001090-PA OS=Aedes aegypti OX=7159 GN=GSTD7 PE=4 SV=1                     |
| Query_10019 | tr Q170D2 Q170D2_AEDAE AAEL007954-PA OS=Aedes aegypti OX=7159 GN=GSTE1 PE=3 SV=2                     |
| Query_10020 | tr Q5PY77 Q5PY77_AEDAE AAEL007951-PA OS=Aedes aegypti OX=7159 GN=GSTe2 PE=1 SV=1                     |
| Query_10021 | tr Q170C6 Q170C6_AEDAE AAEL007947-PA OS=Aedes aegypti OX=7159 GN=GSTE3 PE=3 SV=1                     |
| Query_10022 | tr Q5PY78 Q5PY78_AEDAE AAEL007962-PA OS=Aedes aegypti OX=7159 GN=GSTe4 PE=2 SV=1                     |
| Query_10023 | tr Q170C9 Q170C9_AEDAE AAEL007964-PA OS=Aedes aegypti OX=7159 GN=GSTE5 PE=3 SV=1                     |
| Query_10024 | tr Q170C7 Q170C7_AEDAE AAEL007946-PA OS=Aedes aegypti OX=7159 GN=GSTE6 PE=4 SV=2                     |
| Query_10025 | tr Q170C8 Q170C8_AEDAE AAEL007948-PA OS=Aedes aegypti OX=7159 GN=GSTE7 PE=3 SV=1                     |



Query\_10026 tr|Q170D3|Q170D3\_AEDAE AAEL007955-PA (Fragment) OS=Aedes aegypti OX=7159 GN=GSTE8 PE=4 SV=1

Query\_10027 tr|Q5PY76|Q5PY76\_AEDAE AAEL009017-PA (Fragment) OS=Aedes aegypti OX=7159 GN=GSTt1 PE=2 SV=1

Query\_10028 tr|Q16X19|Q16X19\_AEDAE AAEL009016-PA OS=Aedes aegypti OX=7159 GN=GSTT2 PE=3 SV=2

Query\_10029 tr|Q16X21|Q16X21\_AEDAE AAEL009020-PA OS=Aedes aegypti OX=7159 GN=GSTT3 PE=3 SV=2

Query\_10030 tr|Q17DF6|Q17DF6\_AEDAE AAEL004229-PA OS=Aedes aegypti OX=7159 GN=GSTT4 PE=3 SV=1

Query\_10031 tr|A0A023ENG1|A0A023ENG1\_AEDAL Putative cpj002683 glutathione s-transferase 1-1 OS=Aedes albopictus OX=7160 GN=RP20\_CCG018982 PE=2 SV=1

Query\_10032 tr|A0A023EKA0|A0A023EKA0\_AEDAL Uncharacterized protein OS=Aedes albopictus OX=7160 GN=109402247 PE=2 SV=1

Query\_10033 tr|A0A182GCK7|A0A182GCK7\_AEDAL Uncharacterized protein OS=Aedes albopictus OX=7160 GN=RP20\_CCG007573 PE=3 SV=1

Query\_10034 tr|A0A182GEB4|A0A182GEB4\_AEDAL Uncharacterized protein OS=Aedes albopictus OX=7160 GN=RP20\_CCG008439 PE=3 SV=1

Query\_10035 tr|A0A182GVH4|A0A182GVH4\_AEDAL Uncharacterized protein OS=Aedes albopictus OX=7160 GN=RP20\_CCG016463 PE=3 SV=1

Query\_10036 tr|A0A182GCK8|A0A182GCK8\_AEDAL Uncharacterized protein OS=Aedes albopictus OX=7160 GN=109424803 PE=3 SV=1

Query\_10037 tr|A0A023EK27|A0A023EK27\_AEDAL Putative glutathione s-transferase OS=Aedes albopictus OX=7160 PE=2 SV=1

Query\_10038 tr|A0A023EMF5|A0A023EMF5\_AEDAL Putative glutathione s-transferase e4 OS=Aedes albopictus OX=7160 PE=2 SV=1

Query\_10039 tr|A0A023EK11|A0A023EK11\_AEDAL Putative glutathione s-transferase e2 OS=Aedes albopictus OX=7160 PE=2 SV=1

Query\_10040 tr|A0A023EK53|A0A023EK53\_AEDAL Putative glutathione s-transferase e4 OS=Aedes albopictus OX=7160 PE=2 SV=1

Query\_10041 tr|A0A1W7R8Y6|A0A1W7R8Y6\_AEDAL Putative glutathione s-transferase OS=Aedes albopictus OX=7160 PE=3 SV=1

Query\_10042 tr|A0A023EJP7|A0A023EJP7\_AEDAL Putative glutathione s-transferase 1 isoform d OS=Aedes albopictus OX=7160 PE=2 SV=1

Query\_10043 tr|A0A182GJY7|A0A182GJY7\_AEDAL Uncharacterized protein OS=Aedes albopictus OX=7160 GN=RP20\_CCG011233 PE=3 SV=1

Query\_10044 tr|A0A182GCK6|A0A182GCK6\_AEDAL Uncharacterized protein OS=Aedes albopictus OX=7160 GN=RP20\_CCG007572 PE=3 SV=1

Query\_10045 tr|A0A182GEB7|A0A182GEB7\_AEDAL Uncharacterized protein OS=Aedes albopictus OX=7160 GN=RP20\_CCG008442 PE=3 SV=1

Query\_10046 tr|A0A182H003|A0A182H003\_AEDAL Uncharacterized protein OS=Aedes albopictus OX=7160 GN=RP20\_CCG018985 PE=3 SV=1

Query\_10047 tr|A0A182GYD0|A0A182GYD0\_AEDAL Uncharacterized protein OS=Aedes albopictus OX=7160 GN=RP20\_CCG018089 PE=3 SV=1

Query\_10048 tr|A0A182GHZ1|A0A182GHZ1\_AEDAL Uncharacterized protein OS=Aedes albopictus OX=7160 GN=RP20\_CCG010237 PE=3 SV=1

Query\_10049 tr|A0A182GYD1|A0A182GYD1\_AEDAL Uncharacterized protein OS=Aedes albopictus OX=7160 GN=RP20\_CCG018090 PE=3 SV=1

Query\_10050 tr|A0A182GYC8|A0A182GYC8\_AEDAL Uncharacterized protein OS=Aedes albopictus OX=7160 GN=RP20\_CCG018087 PE=3 SV=1

Query\_10051 tr|A0A182GYC5|A0A182GYC5\_AEDAL Uncharacterized protein OS=Aedes albopictus OX=7160 GN=RP20\_CCG018084 PE=3 SV=1

Query\_10052 tr|A0A182H001|A0A182H001\_AEDAL Uncharacterized protein OS=Aedes albopictus OX=7160 GN=RP20\_CCG018983 PE=3 SV=1

Query\_10053 tr|A0A182GYC6|A0A182GYC6\_AEDAL Uncharacterized protein OS=Aedes albopictus OX=7160 GN=RP20\_CCG018085 PE=3 SV=1

Query\_10054 tr|A0A182G345|A0A182G345\_AEDAL Uncharacterized protein OS=Aedes albopictus OX=7160 GN=RP20\_CCG001852 PE=3 SV=1

Query\_10055 tr|A0A182H002|A0A182H002\_AEDAL Uncharacterized protein OS=Aedes albopictus OX=7160 GN=RP20\_CCG018984 PE=3 SV=1

Query\_10056 tr|A0A1W7R8X7|A0A1W7R8X7\_AEDAL Putative glutathione s-transferase e4 (Fragment) OS=Aedes albopictus OX=7160 PE=4 SV=1

Query\_10057 tr|A0A182GEB5|A0A182GEB5\_AEDAL Uncharacterized protein OS=Aedes albopictus OX=7160 GN=RP20\_CCG008440 PE=4 SV=1

Query\_10058 tr|A0A182GYC7|A0A182GYC7\_AEDAL Uncharacterized protein OS=Aedes albopictus OX=7160 GN=RP20\_CCG018086 PE=4 SV=1

Query\_10059 tr|A0A182GYC9|A0A182GYC9\_AEDAL Uncharacterized protein OS=Aedes albopictus OX=7160 GN=RP20\_CCG018088 PE=4 SV=1

Query\_10060 tr|A0A182GEB6|A0A182GEB6\_AEDAL Uncharacterized protein OS=Aedes albopictus OX=7160 PE=4 SV=1

Query\_10061 XP\_013192421.1 PREDICTED: glutathione S-transferase 1-like [Amyeloid transitella]

Query\_10062 XP\_013189941.1 PREDICTED: glutathione S-transferase 1-like [Amyeloid transitella]

Query\_10063 XP\_013196516.1 PREDICTED: glutathione S-transferase 1-like [Amyeloid transitella]

Query\_10064 XP\_013187010.1 PREDICTED: glutathione S-transferase 1-like [Amyeloid transitella]

Query\_10065 XP\_013196509.1 PREDICTED: glutathione S-transferase 1, isoform C-like [Amyeloid transitella]

Query\_10066 XP\_013194108.1 PREDICTED: uncharacterized protein LOC106137747 [Amyeloid transitella]

Query\_10067 XP\_013196508.1 PREDICTED: glutathione S-transferase 1-1-like [Amyeloid transitella]

Query\_10068 XP\_013198047.1 PREDICTED: glutathione S-transferase 1-like [Amyeloid transitella]

Query\_10069 XP\_013187696.1 PREDICTED: glutathione S-transferase 1, isoform C-like [Amyeloid transitella]

Query\_10070 XP\_013182960.1 PREDICTED: glutathione S-transferase 1-like [Amyeloid transitella]

Query\_10071 NP\_001299595.1 uncharacterized protein LOC106136399 precursor [Amyeloid transitella]

Query\_10072 XP\_013187697.1 PREDICTED: glutathione S-transferase 1, isoform C-like [Amyeloid transitella]

Query\_10073 XP\_013192447.1 PREDICTED: glutathione S-transferase 1-like [Amyeloid transitella]

Query\_10074 XP\_013194098.1 PREDICTED: glutathione S-transferase 1-like [Amyeloid transitella]

Query\_10075 tr|W5JW71|W5JW71\_ANODA Glutathione transferase, delta class OS=Anopheles darlingi OX=43151 GN=AND\_000801 PE=3 SV=1

Query\_10076 tr|W5JXC1|W5JXC1\_ANODA Glutathione transferase, theta class OS=Anopheles darlingi OX=43151 GN=AND\_000084 PE=3 SV=1

Query\_10077 tr|W5JWL4|W5JWL4\_ANODA Glutathione transferase, theta class OS=Anopheles darlingi OX=43151 GN=AND\_000085 PE=3 SV=1

Query\_10078 tr|W5JWI4|W5JWI4\_ANODA Glutathione S-transferase 1-6 OS=Anopheles darlingi OX=43151 GN=AND\_000834 PE=3 SV=1

Query\_10079 tr|W5J8C0|W5J8C0\_ANODA Glutathione transferase OS=Anopheles darlingi OX=43151 GN=AND\_008209 PE=3 SV=1

Query\_10080 tr|W5J9X2|W5J9X2\_ANODA Glutathione S-transferase, epsilon class  
OS=Anopheles darlingi OX=43151 GN=AND\_008205 PE=3 SV=1

Query\_10081 tr|W5JTD5|W5JTD5\_ANODA Glutathione transferase OS=Anopheles darlingi  
OX=43151 GN=AND\_000803 PE=3 SV=1

Query\_10082 tr|W5J8C4|W5J8C4\_ANODA Glutathione S-transferase, epsilon class  
OS=Anopheles darlingi OX=43151 GN=AND\_008208 PE=3 SV=1

Query\_10083 tr|W5JA16|W5JA16\_ANODA Glutathione S-transferase theta-2  
OS=Anopheles darlingi OX=43151 GN=AND\_008797 PE=3 SV=1

Query\_10084 tr|W5J546|W5J546\_ANODA Glutathione transferase OS=Anopheles darlingi  
OX=43151 GN=AND\_008798 PE=3 SV=1

Query\_10085 tr|W5JJP4|W5JJP4\_ANODA Glutathione transferase, delta class  
OS=Anopheles darlingi OX=43151 GN=AND\_004770 PE=3 SV=1

Query\_10086 tr|W5JBQ5|W5JBQ5\_ANODA Glutathione S-transferase, epsilon class  
OS=Anopheles darlingi OX=43151 GN=AND\_008212 PE=3 SV=1

Query\_10087 tr|W5JVI0|W5JVI0\_ANODA Glutathione S transferase D1 OS=Anopheles  
darlingi OX=43151 GN=AND\_000833 PE=3 SV=1

Query\_10088 tr|W5J6X4|W5J6X4\_ANODA Glutathione S-transferase, epsilon class  
OS=Anopheles darlingi OX=43151 GN=AND\_008200 PE=3 SV=1

Query\_10089 tr|W5JSQ1|W5JSQ1\_ANODA Glutathione transferase OS=Anopheles darlingi  
OX=43151 GN=AND\_000804 PE=4 SV=1

Query\_10090 tr|A0A2M4CU45|A0A2M4CU45\_ANODA Putative chain a glutathione s-  
transferase OS=Anopheles darlingi OX=43151 PE=3 SV=1

Query\_10091 tr|A0A2M4CV43|A0A2M4CV43\_ANODA Putative chain a glutathione s-  
transferase OS=Anopheles darlingi OX=43151 PE=3 SV=1

Query\_10092 tr|A0A2M4CJX8|A0A2M4CJX8\_ANODA Putative glutathione s-transferase 1  
isoform d (Fragment) OS=Anopheles darlingi OX=43151 PE=3 SV=1

Query\_10093 tr|A0A2M4CYI6|A0A2M4CYI6\_ANODA Putative glutathione s-transferase  
epsilon class OS=Anopheles darlingi OX=43151 PE=3 SV=1

Query\_10094 tr|W5JWK8|W5JWK8\_ANODA Glutathione transferase OS=Anopheles  
darlingi OX=43151 GN=AND\_000802 PE=4 SV=1

Query\_10095 tr|W5J882|W5J882\_ANODA Glutathione transferase OS=Anopheles darlingi  
OX=43151 GN=AND\_008796 PE=4 SV=1

Query\_10096 tr|W5JBI5|W5JBI5\_ANODA Glutathione transferase OS=Anopheles darlingi  
OX=43151 GN=AND\_008211 PE=4 SV=1

Query\_10097 tr|W5J6X9|W5J6X9\_ANODA Glutathione S-transferase, epsilon class  
OS=Anopheles darlingi OX=43151 GN=AND\_008204 PE=4 SV=1

Query\_10098 tr|W5JW53|W5JW53\_ANODA Glutathione transferase, delta class  
OS=Anopheles darlingi OX=43151 GN=AND\_000835 PE=4 SV=1

Query\_10099 tr|W5JC52|W5JC52\_ANODA Glutathione transferase, delta class  
OS=Anopheles darlingi OX=43151 GN=AND\_007981 PE=4 SV=1

Query\_10100 tr|A0A084WTH5|A0A084WTH5\_ANOSI Glutathione S-transferase D6  
OS=Anopheles sinensis OX=74873 GN=ZHAS\_00021747 PE=3 SV=1

Query\_10101 tr|A0A084VMZ2|A0A084VMZ2\_ANOSI Glutathione s-transferase E5  
OS=Anopheles sinensis OX=74873 GN=ZHAS\_00006696 PE=3 SV=1

Query\_10102 tr|A0A084WQQ1|A0A084WQQ1\_ANOSI Glutathione transferase epsilon3  
OS=Anopheles sinensis OX=74873 GN=ZHAS\_00020795 PE=3 SV=1

Query\_10103 tr|A0A084WQQ3|A0A084WQQ3\_ANOSI Glutathione s-transferase E2  
OS=Anopheles sinensis OX=74873 GN=ZHAS\_00020699 PE=3 SV=1

Query\_10104 tr|A0A084VQI2|A0A084VQI2\_ANOSI AGAP000888-PA-like protein  
OS=Anopheles sinensis OX=74873 GN=ZHAS\_00007603 PE=3 SV=1

Query\_10105 tr|A0A084VQI3|A0A084VQI3\_ANOSI Uncharacterized protein  
OS=Anopheles sinensis OX=74873 GN=ZHAS\_00007604 PE=3 SV=1

Query\_10106 tr|A0A084WTH9|A0A084WTH9\_ANOSI AGAP004383-PA-like protein  
OS=Anopheles sinensis OX=74873 GN=ZHAS\_00021752 PE=3 SV=1

Query\_10107 tr|A0A084WTI1|A0A084WTI1\_ANOSI Uncharacterized protein  
OS=Anopheles sinensis OX=74873 GN=ZHAS\_00021754 PE=3 SV=1

Query\_10108 tr|A0A084WTH8|A0A084WTH8\_ANOSI AGAP004382-PA-like protein  
OS=Anopheles sinensis OX=74873 GN=ZHAS\_00021751 PE=3 SV=1

Query\_10109 tr|A0A084WTH6|A0A084WTH6\_ANOSI AGAP004380-PA-like protein  
OS=Anopheles sinensis OX=74873 GN=ZHAS\_00021748 PE=3 SV=1

Query\_10110 tr|A0A084WTH7|A0A084WTH7\_ANOSI AGAP004382-PA-like protein  
OS=Anopheles sinensis OX=74873 GN=ZHAS\_00021749 PE=3 SV=1

Query\_10111 tr|A0A084WTI2|A0A084WTI2\_ANOSI AGAP004171-PA-like protein  
OS=Anopheles sinensis OX=74873 GN=ZHAS\_00021755 PE=3 SV=1

Query\_10112 tr|A0A084WTH4|A0A084WTH4\_ANOSI AGAP004378-PA-like protein  
OS=Anopheles sinensis OX=74873 GN=ZHAS\_00021746 PE=3 SV=1

Query\_10113 tr|A0A084VUG1|A0A084VUG1\_ANOSI AGAP003257-PA-like protein  
OS=Anopheles sinensis OX=74873 GN=ZHAS\_00009226 PE=3 SV=1

Query\_10114 tr|A0A084VMZ0|A0A084VMZ0\_ANOSI AGAP009190-PA-like protein  
OS=Anopheles sinensis OX=74873 GN=ZHAS\_00006694 PE=3 SV=1

Query\_10115 tr|A0A084WTJ6|A0A084WTJ6\_ANOSI AGAP004164-PB-like protein  
OS=Anopheles sinensis OX=74873 GN=ZHAS\_00021770 PE=3 SV=1

Query\_10116 tr|A0A084VMZ4|A0A084VMZ4\_ANOSI Glutathione s-transferase E2  
OS=Anopheles sinensis OX=74873 GN=ZHAS\_00006698 PE=4 SV=1

Query\_10117 tr|A0A084VMZ3|A0A084VMZ3\_ANOSI Glutathione s-transferase E4  
OS=Anopheles sinensis OX=74873 GN=ZHAS\_00006697 PE=4 SV=1

Query\_10118 tr|A0A084WQQ2|A0A084WQQ2\_ANOSI Glutathione s-transferase E2  
OS=Anopheles sinensis OX=74873 GN=ZHAS\_00020698 PE=4 SV=1

Query\_10119 tr|A0A084VMZ1|A0A084VMZ1\_ANOSI Glutathione s-transferase E6  
OS=Anopheles sinensis OX=74873 GN=ZHAS\_00006695 PE=4 SV=1

Query\_10120 tr|A0A084WCJ1|A0A084WCJ1\_ANOSI AGAP011334-PA-like protein  
OS=Anopheles sinensis OX=74873 GN=ZHAS\_00015997 PE=4 SV=1

Query\_10121 tr|A0A084WTI0|A0A084WTI0\_ANOSI AGAP004173-PA-like protein  
OS=Anopheles sinensis OX=74873 GN=ZHAS\_00021753 PE=4 SV=1

Query\_10122 tr|A0A084WTJ9|A0A084WTJ9\_ANOSI AGAP004163-PB-like protein  
OS=Anopheles sinensis OX=74873 GN=ZHAS\_00021774 PE=4 SV=1

Query\_10123 sp|Q93113|GST1D\_ANOGA Glutathione S-transferase 1, isoform D  
OS=Anopheles gambiae OX=7165 GN=GstD1 PE=1 SV=1

Query\_10124 tr|Q7QA79|Q7QA79\_ANOGA AGAP004383-PA OS=Anopheles gambiae  
OX=7165 GN=GSTD10 PE=4 SV=1

Query\_10125 tr|Q8MUS1|Q8MUS1\_ANOGA Glutathione S-transferase D11 OS=Anopheles  
gambiae OX=7165 GN=GSTd11 PE=2 SV=1

Query\_10126 tr|Q9GPL6|Q9GPL6\_ANOGA AGAP004380-PA OS=Anopheles gambiae  
OX=7165 GN=GSTD12 PE=2 SV=1

Query\_10127 sp|Q94999|GSTT2\_ANOGA Glutathione S-transferase 2 OS=Anopheles  
gambiae OX=7165 GN=GstD2 PE=3 SV=2

Query\_10128 tr|Q7PQ95|Q7PQ95\_ANOGA AGAP004382-PA OS=Anopheles gambiae  
OX=7165 GN=GSTD3 PE=3 SV=3

Query\_10129 tr|Q5TT03|Q5TT03\_ANOGA AGAP004381-PA OS=Anopheles gambiae  
OX=7165 GN=GSTD4 PE=3 SV=1

Query\_10130 tr|Q7QB59|Q7QB59\_ANOGA AGAP004173-PA OS=Anopheles gambiae  
OX=7165 GN=GSTD5 PE=4 SV=1

Query\_10131 tr|Q8MUS2|Q8MUS2\_ANOGA Glutathione S-transferase D6 (Fragment)  
OS=Anopheles gambiae OX=7165 GN=GSTd6 PE=2 SV=1

Query\_10132 sp|O76483|GSTT7\_ANOGA Glutathione S-transferase D7 OS=Anopheles  
gambiae OX=7165 GN=GstD7 PE=2 SV=1

Query\_10133 tr|Q5TTE5|Q5TTE5\_ANOGA AGAP004171-PA OS=Anopheles gambiae  
OX=7165 GN=GSTD8 PE=3 SV=2

Query\_10134 tr|Q86D84|Q86D84\_ANOGA AGAP004172-PA OS=Anopheles gambiae  
OX=7165 GN=GSTd9 PE=4 SV=1

Query\_10135 tr|Q9GPL9|Q9GPL9\_ANOGA AGAP009195-PA OS=Anopheles gambiae  
OX=7165 GN=GSTE1 PE=2 SV=1

Query\_10136 tr|Q7PVS6|Q7PVS6\_ANOGA AGAP009194-PA OS=Anopheles gambiae  
OX=7165 GN=GSTE2 PE=1 SV=3

Query\_10137 tr|Q8WQJ9|Q8WQJ9\_ANOGA AGAP009197-PA OS=Anopheles gambiae  
OX=7165 GN=GSTe3 PE=3 SV=1

Query\_10138 tr|Q8WQJ8|Q8WQJ8\_ANOGA AGAP009193-PA OS=Anopheles gambiae  
OX=7165 GN=GSTe4 PE=2 SV=1

Query\_10139 tr|Q8WQJ7|Q8WQJ7\_ANOGA AGAP009192-PA OS=Anopheles gambiae  
OX=7165 GN=GSTe5 PE=2 SV=1

Query\_10140 tr|A0NG89|A0NG89\_ANOGA AGAP009191-PA OS=Anopheles gambiae  
OX=7165 GN=GSTE6 PE=3 SV=1

Query\_10141 tr|Q7PVS4|Q7PVS4\_ANOGA AGAP009196-PA OS=Anopheles gambiae  
OX=7165 GN=GSTE7 PE=4 SV=3

Query\_10142 tr|Q8WQJ5|Q8WQJ5\_ANOGA AGAP009190-PA OS=Anopheles gambiae  
OX=7165 GN=GSTe8 PE=2 SV=1

Query\_10143 tr|Q8MUQ1|Q8MUQ1\_ANOGA AGAP000761-PA OS=Anopheles gambiae  
OX=7165 GN=gstT1 PE=2 SV=1

Query\_10144 tr|Q8MUQ2|Q8MUQ2\_ANOGA AGAP000888-PA OS=Anopheles gambiae  
OX=7165 GN=gstT2 PE=2 SV=1

Query\_10145 tr|A0A087ZVS9|A0A087ZVS9\_APIME Uncharacterized protein OS=Apis  
mellifera OX=7460 GN=GstT1 PE=3 SV=1

Query\_10146 tr|A0A088AFL5|A0A088AFL5\_APIME Uncharacterized protein OS=Apis  
mellifera OX=7460 GN=GstD1 PE=4 SV=1

Query\_10147 tr|Q6IVB7|Q6IVB7\_APILI Glutathione-S-transferase 1 (Fragment) OS=Apis  
mellifera ligustica OX=7469 GN=gst1 PE=2 SV=2

Query\_10148 tr|Q2I0J5|Q2I0J5\_BOMMO Glutathione S-transferase 3 OS=Bombyx mori  
OX=7091 GN=693114 PE=2 SV=1

Query\_10149 tr|H9IYE6|H9IYE6\_BOMMO Uncharacterized protein OS=Bombyx mori  
OX=7091 PE=3 SV=1

Query\_10150 tr|O61996|O61996\_BOMMO Glutathione S-transferase OS=Bombyx mori  
OX=7091 GN=692678 PE=1 SV=1

Query\_10151 tr|H9JAU4|H9JAU4\_BOMMO Uncharacterized protein OS=Bombyx mori  
OX=7091 PE=4 SV=1

Query\_10152 tr|H9JK84|H9JK84\_BOMMO Uncharacterized protein OS=Bombyx mori  
OX=7091 PE=3 SV=1

Query\_10153 tr|H9JKA0|H9JKA0\_BOMMO Uncharacterized protein OS=Bombyx mori  
OX=7091 PE=3 SV=1

Query\_10154 tr|H9JKP2|H9JKP2\_BOMMO Uncharacterized protein OS=Bombyx mori  
OX=7091 PE=3 SV=1

Query\_10155 tr|H9JKP3|H9JKP3\_BOMMO Uncharacterized protein OS=Bombyx mori  
OX=7091 PE=3 SV=1

Query\_10156 BmoriGSTE7

Query\_10157 tr|B0LB16|B0LB16\_BOMMO Epsilon-class glutathione transferase  
OS=Bombyx mori OX=7091 GN=gste PE=2 SV=1

Query\_10158 tr|A0A077D6E7|A0A077D6E7\_CNAME Glutathione S-transferase delta 1  
OS=Cnaphalocrocis medinalis OX=437488 PE=2 SV=1

Query\_10159 tr|A0A077D817|A0A077D817\_CNAME Glutathione S-transferase epsilon 1  
OS=Cnaphalocrocis medinalis OX=437488 PE=2 SV=1

Query\_10160 tr|A0A0A7KNK1|A0A0A7KNK1\_CNAME Glutathione S-transferase delta 4  
OS=Cnaphalocrocis medinalis OX=437488 PE=2 SV=1

Query\_10161 tr|A0A077D9Y8|A0A077D9Y8\_CNAME Glutathione S-transferase epsilon 2 OS=Cnaphalocrocis medinalis OX=437488 PE=2 SV=1

Query\_10162 tr|A0A0A7KL70|A0A0A7KL70\_CNAME Glutathione S-transferase epsilon 9 OS=Cnaphalocrocis medinalis OX=437488 PE=2 SV=1

Query\_10163 tr|A0A0A7KQB0|A0A0A7KQB0\_CNAME Glutathione S-transferase delta 3 OS=Cnaphalocrocis medinalis OX=437488 PE=2 SV=1

Query\_10164 tr|A0A077D602|A0A077D602\_CNAME Glutathione S-transferase OS=Cnaphalocrocis medinalis OX=437488 PE=2 SV=1

Query\_10165 tr|A0A0A7KLA5|A0A0A7KLA5\_CNAME Glutathione S-transferase epsilon 8 OS=Cnaphalocrocis medinalis OX=437488 PE=2 SV=1

Query\_10166 tr|A0A077D820|A0A077D820\_CNAME Glutathione S-transferase epsilon 6 (Fragment) OS=Cnaphalocrocis medinalis OX=437488 PE=2 SV=1

Query\_10167 tr|A0A077D5Z1|A0A077D5Z1\_CNAME Glutathione S-transferase epsilon 5 (Fragment) OS=Cnaphalocrocis medinalis OX=437488 PE=2 SV=1

Query\_10168 tr|A0A077D5Y7|A0A077D5Y7\_CNAME Glutathione S-transferase delta 2 OS=Cnaphalocrocis medinalis OX=437488 PE=2 SV=1

Query\_10169 tr|A0A077DB43|A0A077DB43\_CNAME Glutathione S-transferase epsilon 3 OS=Cnaphalocrocis medinalis OX=437488 PE=2 SV=1

Query\_10170 tr|A0A077D6F2|A0A077D6F2\_CNAME Glutathione S-transferase epsilon 4 OS=Cnaphalocrocis medinalis OX=437488 PE=2 SV=1

Query\_10171 tr|A0A0A7KLF5|A0A0A7KLF5\_CNAME Glutathione S-transferase epsilon 7 OS=Cnaphalocrocis medinalis OX=437488 PE=2 SV=1

Query\_10172 tr|B0VZJ3|B0VZJ3\_CULQU Glutathione S-transferase D2 OS=Culex quinquefasciatus OX=7176 GN=6031025 PE=3 SV=1

Query\_10173 tr|B0W6A9|B0W6A9\_CULQU Glutathione-s-transferase theta, gst OS=Culex quinquefasciatus OX=7176 GN=6033850 PE=4 SV=1

Query\_10174 tr|B0W6B2|B0W6B2\_CULQU Glutathione S-transferase 1-1 OS=Culex quinquefasciatus OX=7176 GN=6033854 PE=3 SV=1

Query\_10175 tr|B0W6C3|B0W6C3\_CULQU Glutathione S-transferase 1 OS=Culex quinquefasciatus OX=7176 GN=6033865 PE=4 SV=1

Query\_10176 tr|B0W6C4|B0W6C4\_CULQU Glutathione S-transferase 1 OS=Culex quinquefasciatus OX=7176 GN=6033866 PE=4 SV=1

Query\_10177 tr|B0W6C5|B0W6C5\_CULQU Glutathione S-transferase D7 OS=Culex quinquefasciatus OX=7176 GN=6033867 PE=3 SV=1

Query\_10178 tr|B0W6C7|B0W6C7\_CULQU Glutathione transferase I OS=Culex quinquefasciatus OX=7176 GN=6033869 PE=3 SV=1

Query\_10179 tr|B0W6C8|B0W6C8\_CULQU Glutathione S-transferase theta-2 OS=Culex quinquefasciatus OX=7176 GN=6033870 PE=3 SV=1

Query\_10180 tr|B0W6C9|B0W6C9\_CULQU Glutathione S-transferase OS=Culex quinquefasciatus OX=7176 GN=6033871 PE=4 SV=1

Query\_10181 tr|B0W6D0|B0W6D0\_CULQU Glutathione S-transferase OS=Culex quinquefasciatus OX=7176 GN=6033872 PE=3 SV=1

Query\_10182 tr|A0A1S4J718|A0A1S4J718\_CULQU GSTD2 protein OS=Culex quinquefasciatus OX=7176 PE=3 SV=1

Query\_10183 tr|B0W6D2|B0W6D2\_CULQU Glutathione S-transferase 1-1 OS=Culex quinquefasciatus OX=7176 GN=6033874 PE=3 SV=1

Query\_10184 tr|B0WQW9|B0WQW9\_CULQU Glutathione S-transferase 1 OS=Culex quinquefasciatus OX=7176 GN=6041912 PE=3 SV=1

Query\_10185 tr|B0WUG8|B0WUG8\_CULQU Glutathione S-transferase 1-5 OS=Culex quinquefasciatus OX=7176 GN=6043364 PE=3 SV=1

Query\_10186 tr|B0X3C7|B0X3C7\_CULQU Glutathione-s-transferase theta, gst OS=Culex quinquefasciatus OX=7176 GN=6047041 PE=3 SV=1

Query\_10187 tr|B0X3C8|B0X3C8\_CULQU Glutathione-s-transferase theta, gst OS=Culex quinquefasciatus OX=7176 GN=6047042 PE=3 SV=1

Query\_10188 tr|B0X3C9|B0X3C9\_CULQU Glutathione-s-transferase theta, gst OS=Culex quinquefasciatus OX=7176 GN=6047043 PE=3 SV=1  
 Query\_10189 tr|B0X3D0|B0X3D0\_CULQU Glutathione S-transferase theta-1 OS=Culex quinquefasciatus OX=7176 GN=6047044 PE=3 SV=1  
 Query\_10190 tr|B0XGJ6|B0XGJ6\_CULQU Glutathione-s-transferase theta, gst OS=Culex quinquefasciatus OX=7176 GN=6052508 PE=3 SV=1  
 Query\_10191 tr|B0XGJ7|B0XGJ7\_CULQU Glutathione-s-transferase theta, gst OS=Culex quinquefasciatus OX=7176 GN=6052509 PE=4 SV=1  
 Query\_10192 tr|B0XGJ8|B0XGJ8\_CULQU Glutathione S-transferase 1-1 OS=Culex quinquefasciatus OX=7176 GN=6052510 PE=3 SV=1  
 Query\_10193 tr|B0XGJ9|B0XGJ9\_CULQU Glutathione S-transferase E2 OS=Culex quinquefasciatus OX=7176 GN=6052511 PE=4 SV=1  
 Query\_10194 tr|B0XGK0|B0XGK0\_CULQU Glutathione-s-transferase theta, gst OS=Culex quinquefasciatus OX=7176 GN=6052512 PE=3 SV=1  
 Query\_10195 tr|B0XGK1|B0XGK1\_CULQU Glutathione S-transferase 1-1 OS=Culex quinquefasciatus OX=7176 GN=6052513 PE=4 SV=1  
 Query\_10196 tr|B0XGK2|B0XGK2\_CULQU Glutathione-s-transferase theta, gst OS=Culex quinquefasciatus OX=7176 GN=6052515 PE=4 SV=1  
 Query\_10197 tr|B0XGK3|B0XGK3\_CULQU Glutathione-s-transferase theta, gst OS=Culex quinquefasciatus OX=7176 GN=6052516 PE=4 SV=1  
 Query\_10198 tr|B0XGK4|B0XGK4\_CULQU Glutathione-s-transferase theta OS=Culex quinquefasciatus OX=7176 GN=6052517 PE=4 SV=1  
 Query\_10199 tr|B0XJU4|B0XJU4\_CULQU Glutathione transferase AtGST OS=Culex quinquefasciatus OX=7176 GN=6053908 PE=4 SV=1  
 Query\_10200 tr|B0XLC5|B0XLC5\_CULQU Glutathione transferase AtGST OS=Culex quinquefasciatus OX=7176 GN=6054553 PE=3 SV=1  
 Query\_10201 DPOGS200212-PA  
 Query\_10202 DPOGS202622-PA  
 Query\_10203 DPOGS204831-PA  
 Query\_10204 DPOGS207576-PA  
 Query\_10205 DPOGS207703-PA  
 Query\_10206 DPOGS208312-PA  
 Query\_10207 DPOGS209578-PA  
 Query\_10208 DPOGS210477-PA  
 Query\_10209 DPOGS210488-PA  
 Query\_10210 DPOGS210526-PA  
 Query\_10211 sp|P20432|GSTD1\_DROME Glutathione S-transferase D1 OS=Drosophila melanogaster GN=GstD1 PE=1 SV=1  
 Query\_10212 tr|Q9VGA1|Q9VGA1\_DROME Glutathione S transferase D10, isoform A OS=Drosophila melanogaster GN=GstD10 PE=1 SV=1  
 Query\_10213 tr|B7Z0S9|B7Z0S9\_DROME Glutathione S transferase D11, isoform B OS=Drosophila melanogaster GN=GstD11 PE=4 SV=1  
 Query\_10214 tr|Q8SXQ9|Q8SXQ9\_DROME Glutathione S transferase D11, isoform A OS=Drosophila melanogaster GN=GstD11 PE=2 SV=1  
 Query\_10215 sp|Q9VG98|GSTD2\_DROME Glutathione S-transferase D2 OS=Drosophila melanogaster GN=GstD2 PE=1 SV=1  
 Query\_10216 sp|Q9VG97|GSTD3\_DROME Inactive glutathione S-transferase D3 OS=Drosophila melanogaster GN=GstD3 PE=2 SV=1

Query\_10217 sp|Q9VG96|GSTD4\_DROME Glutathione S-transferase D4 OS=Drosophila melanogaster GN=GstD4 PE=1 SV=1

Query\_10218 sp|Q9VG95|GSTD5\_DROME Glutathione S-transferase D5 OS=Drosophila melanogaster GN=GstD5 PE=1 SV=2

Query\_10219 sp|Q9VG94|GSTD6\_DROME Glutathione S-transferase D6 OS=Drosophila melanogaster GN=GstD6 PE=1 SV=1

Query\_10220 sp|Q9VG93|GSTD7\_DROME Glutathione S-transferase D7 OS=Drosophila melanogaster GN=GstD7 PE=1 SV=1

Query\_10221 tr|Q9VG92|Q9VG92\_DROME Glutathione S transferase D8 OS=Drosophila melanogaster GN=GstD8 PE=2 SV=1

Query\_10222 tr|Q9VGA0|Q9VGA0\_DROME Glutathione S transferase D9, isoform A OS=Drosophila melanogaster GN=GstD9 PE=1 SV=1

Query\_10223 tr|Q7KK90|Q7KK90\_DROME GH14654p OS=Drosophila melanogaster GN=GstE1 PE=1 SV=1

Query\_10224 tr|Q4V6J1|Q4V6J1\_DROME Glutathione S transferase E10, isoform A OS=Drosophila melanogaster GN=GstE10 PE=2 SV=1

Query\_10225 tr|Q7JVZ8|Q7JVZ8\_DROME Glutathione S transferase E11, isoform A OS=Drosophila melanogaster GN=GstE11 PE=1 SV=1

Query\_10226 tr|Q9XYZ9|Q9XYZ9\_DROME Glutathione S transferase E12, isoform A OS=Drosophila melanogaster GN=GstE12 PE=1 SV=1

Query\_10227 tr|Q7JVI6|Q7JVI6\_DROME Glutathione S transferase E13, isoform A OS=Drosophila melanogaster GN=GstE13 PE=1 SV=1

Query\_10228 sp|Q7JYX0|GSTEE\_DROME Glutathione S-transferase E14 OS=Drosophila melanogaster GN=GstE14 PE=1 SV=1

Query\_10229 tr|Q7JYZ9|Q7JYZ9\_DROME Glutathione S transferase E2 OS=Drosophila melanogaster GN=GstE2 PE=2 SV=1

Query\_10230 tr|A1ZB68|A1ZB68\_DROME FI01423p OS=Drosophila melanogaster GN=GstE3 PE=1 SV=1

Query\_10231 tr|A1ZB69|A1ZB69\_DROME Glutathione S transferase E4 OS=Drosophila melanogaster GN=GstE4 PE=3 SV=1

Query\_10232 tr|A1ZB70|A1ZB70\_DROME Glutathione S transferase E5 OS=Drosophila melanogaster GN=GstE5 PE=3 SV=1

Query\_10233 tr|A1ZB71|A1ZB71\_DROME Glutathione S transferase E6 OS=Drosophila melanogaster GN=GstE6 PE=1 SV=1

Query\_10234 tr|A1ZB72|A1ZB72\_DROME Glutathione S transferase E7 OS=Drosophila melanogaster GN=GstE7 PE=1 SV=1

Query\_10235 tr|A1ZB73|A1ZB73\_DROME Glutathione S transferase E8, isoform A OS=Drosophila melanogaster GN=GstE8 PE=3 SV=1

Query\_10236 tr|Q7K8X7|Q7K8X7\_DROME Glutathione S transferase E9 OS=Drosophila melanogaster GN=GstE9 PE=1 SV=1

Query\_10237 tr|Q7K0B6|Q7K0B6\_DROME Glutathione S transferase T1 OS=Drosophila melanogaster OX=7227 GN=GstT1 PE=1 SV=1

Query\_10238 tr|A1Z7X7|A1Z7X7\_DROME Glutathione S transferase T2 OS=Drosophila melanogaster OX=7227 GN=GstT2 PE=1 SV=2

Query\_10239 tr|Q9VRA4|Q9VRA4\_DROME Glutathione S transferase T3, isoform A OS=Drosophila melanogaster OX=7227 GN=GstT3 PE=3 SV=2

Query\_10240 tr|E1JJS1|E1JJS1\_DROME Glutathione S transferase T3, isoform B OS=Drosophila melanogaster OX=7227 GN=GstT3 PE=3 SV=1

Query\_10241 tr|Q8MRM0|Q8MRM0\_DROME GH16740p OS=Drosophila melanogaster OX=7227 GN=GstT4 PE=1 SV=1

Query\_10242 tr|A0A291ARU4|A0A291ARU4\_HELAM Glutathione S-transferase OS=Helicoverpa armigera OX=29058 GN=GST8 PE=2 SV=1

Query\_10243 tr|A0A2W1BRB0|A0A2W1BRB0\_HELAM Uncharacterized protein OS=Helicoverpa armigera OX=29058 GN=HaOG200226 PE=3 SV=1



Query\_10244 tr|A0A2W1BSA5|A0A2W1BSA5\_HELAM Uncharacterized protein OS=Helicoverpa armigera OX=29058 GN=HaOG200219 PE=3 SV=1

Query\_10245 tr|A0A2W1BUA9|A0A2W1BUA9\_HELAM Uncharacterized protein OS=Helicoverpa armigera OX=29058 GN=HaOG200217 PE=3 SV=1

Query\_10246 tr|A0A2W1BZ02|A0A2W1BZ02\_HELAM Uncharacterized protein OS=Helicoverpa armigera OX=29058 GN=HaOG200220 PE=3 SV=1

Query\_10247 tr|A0MSN0|A0MSN0\_HELAM Glutathione S-transferase OS=Helicoverpa armigera OX=29058 PE=2 SV=1

Query\_10248 tr|B6A8L4|B6A8L4\_HELAM Glutathione S-transferase (Fragment) OS=Helicoverpa armigera OX=29058 PE=2 SV=1

Query\_10249 tr|C8YL89|C8YL89\_HELAM Glutathione S-transferase 16 OS=Helicoverpa armigera OX=29058 GN=GST16 PE=2 SV=1

Query\_10250 tr|D7NI45|D7NI45\_HELAM Glutathione S-transferase OS=Helicoverpa armigera OX=29058 GN=GST6 PE=2 SV=1

Query\_10251 AIB07715.1 glutathione S-transferase GSTD1 [Helicoverpa armigera]

Query\_10252 AIB07714.1 glutathione S-transferase GSTD3 [Helicoverpa armigera]

Query\_10253 AIB07716.1 glutathione S-transferase GSTD4 [Helicoverpa armigera]

Query\_10254 AIB07717.1 glutathione S-transferase GSTD5, partial [Helicoverpa armigera]

Query\_10255 XP\_021189521.1 glutathione S-transferase D7-like isoform X1 [Helicoverpa armigera]

Query\_10256 Helicoverpa\_armigera\_GSTE14-like\_isoform\_X2

Query\_10257 tr|Q7Z0Q7|Q7Z0Q7\_HELAM Glutathione S-transferase (Fragment) OS=Helicoverpa armigera OX=29058 PE=2 SV=1

Query\_10258 tr|Q7Z0Q8|Q7Z0Q8\_HELAM Glutathione S-transferase (Fragment) OS=Helicoverpa armigera OX=29058 PE=2 SV=1

Query\_10259 tr|Q7Z0Q9|Q7Z0Q9\_HELAM Glutathione S-transferase (Fragment) OS=Helicoverpa armigera OX=29058 PE=2 SV=1

Query\_10260 tr|A0A2A4JDE9|A0A2A4JDE9\_HELVI Uncharacterized protein OS=Heliothis virescens OX=7102 GN=B5V51\_3669 PE=3 SV=1

Query\_10261 tr|A0A2A4IXQ2|A0A2A4IXQ2\_HELVI Uncharacterized protein OS=Heliothis virescens OX=7102 GN=B5V51\_11472 PE=3 SV=1

Query\_10262 tr|A0A2A4JI76|A0A2A4JI76\_HELVI Uncharacterized protein OS=Heliothis virescens OX=7102 GN=B5V51\_1534 PE=3 SV=1

Query\_10263 tr|A0A2A4JDN1|A0A2A4JDN1\_HELVI Uncharacterized protein OS=Heliothis virescens OX=7102 GN=B5V51\_3670 PE=3 SV=1

Query\_10264 tr|A0A2A4JU40|A0A2A4JU40\_HELVI Uncharacterized protein OS=Heliothis virescens OX=7102 GN=B5V51\_11931 PE=3 SV=1

Query\_10265 tr|A0A2A4IV17|A0A2A4IV17\_HELVI Uncharacterized protein OS=Heliothis virescens OX=7102 GN=B5V51\_12180 PE=3 SV=1

Query\_10266 tr|A0A2A4IXK8|A0A2A4IXK8\_HELVI Uncharacterized protein OS=Heliothis virescens OX=7102 GN=B5V51\_10494 PE=3 SV=1

Query\_10267 tr|A0A2A4JCV1|A0A2A4JCV1\_HELVI Uncharacterized protein OS=Heliothis virescens OX=7102 GN=B5V51\_3945 PE=3 SV=1

Query\_10268 tr|A0A2A4JV70|A0A2A4JV70\_HELVI Uncharacterized protein OS=Heliothis virescens OX=7102 GN=B5V51\_11943 PE=3 SV=1

Query\_10269 tr|A0A2A4IY34|A0A2A4IY34\_HELVI Uncharacterized protein (Fragment) OS=Heliothis virescens OX=7102 GN=B5V51\_11290 PE=4 SV=1

Query\_10270 tr|A0A2A4JKT9|A0A2A4JKT9\_HELVI Uncharacterized protein OS=Heliothis virescens OX=7102 GN=B5V51\_845 PE=4 SV=1

Query\_10271 NP\_001165913.1 glutathione S-transferase D1 [Nasonia vitripennis]

Query\_10272 NP\_001165914.1 glutathione S-transferase D3 [Nasonia vitripennis]  
 Query\_10273 NP\_001165915.1 glutathione S-transferase D5 [Nasonia vitripennis]  
 Query\_10274 NP\_001165925.1 glutathione S-transferase T2 [Nasonia vitripennis]  
 Query\_10275 NP\_001165926.1 glutathione S-transferase T1 [Nasonia vitripennis]  
 Query\_10276 NP\_001165927.1 glutathione S-transferase T3 [Nasonia vitripennis]  
 Query\_10277 XP\_001600187.1 PREDICTED: glutathione S-transferase D7 [Nasonia vitripennis]  
 Query\_10278 tr|A0A0L7KM86|A0A0L7KM86\_9NEOP Glutathione S-transferase OS=Operophtera brumata OX=104452 GN=OBRU01\_24524 PE=3 SV=1  
 Query\_10279 tr|A0A0L7LFQ3|A0A0L7LFQ3\_9NEOP Glutathione S-transferase epsilon (Fragment) OS=Operophtera brumata OX=104452 GN=OBRU01\_09353 PE=4 SV=1  
 Query\_10280 tr|A0A0L7LME0|A0A0L7LME0\_9NEOP Glutathione S-transferase 1-6 (Fragment) OS=Operophtera brumata OX=104452 GN=OBRU01\_05580 PE=3 SV=1  
 Query\_10281 tr|A0A0L7LPT4|A0A0L7LPT4\_9NEOP Glutathione S-transferase OS=Operophtera brumata OX=104452 GN=OBRU01\_04185 PE=3 SV=1  
 Query\_10282 tr|A0A0L7LTB4|A0A0L7LTB4\_9NEOP Glutathione S-transferase OS=Operophtera brumata OX=104452 GN=OBRU01\_01600 PE=3 SV=1  
 Query\_10283 tr|A0A0L7LTL7|A0A0L7LTL7\_9NEOP Glutathione S-transferase epsilon 11 OS=Operophtera brumata OX=104452 GN=OBRU01\_01599 PE=3 SV=1  
 Query\_10284 tr|A0A0L7LI53|A0A0L7LI53\_9NEOP Glutathione S-transferase epsilon 6 (Fragment) OS=Operophtera brumata OX=104452 GN=OBRU01\_07826 PE=4 SV=1  
 Query\_10285 tr|A0A0L7KLM3|A0A0L7KLM3\_9NEOP Glutathione S-transferase 10 OS=Operophtera brumata OX=104452 GN=OBRU01\_24503 PE=4 SV=1  
 Query\_10286 tr|A0A0L7L1M8|A0A0L7L1M8\_9NEOP Glutathione S-transferase epsilon 3 OS=Operophtera brumata OX=104452 GN=OBRU01\_16992 PE=4 SV=1  
 Query\_10287 tr|A0A0L7LM54|A0A0L7LM54\_9NEOP Glutathione S-transferase 1 OS=Operophtera brumata OX=104452 GN=OBRU01\_05579 PE=4 SV=1  
 Query\_10288 tr|A0A194QXR6|A0A194QXR6\_PAPMA Glutathione S-transferase D7 OS=Papilio machaon OX=76193 GN=RR48\_13110 PE=4 SV=1  
 Query\_10289 tr|A0A194R5D8|A0A194R5D8\_PAPMA Glutathione S-transferase 1 OS=Papilio machaon OX=76193 GN=RR48\_10522 PE=4 SV=1  
 Query\_10290 tr|A0A0N1PJW2|A0A0N1PJW2\_PAPMA Glutathione S-transferase theta-1 OS=Papilio machaon OX=76193 GN=RR48\_04090 PE=3 SV=1  
 Query\_10291 tr|A0A194QX62|A0A194QX62\_PAPMA Glutathione S-transferase 1, isoform D OS=Papilio machaon OX=76193 GN=RR48\_13184 PE=3 SV=1  
 Query\_10292 tr|A0A194REA6|A0A194REA6\_PAPMA Glutathione S-transferase 1-1 OS=Papilio machaon OX=76193 GN=RR48\_07011 PE=3 SV=1  
 Query\_10293 XP\_014368559.1 PREDICTED: glutathione S-transferase E14-like [Papilio machaon]  
 Query\_10294 tr|I4DRD9|I4DRD9\_PAPPL Glutathione S transferase D8 OS=Papilio polytes OX=76194 PE=2 SV=1  
 Query\_10295 tr|I4DRZ4|I4DRZ4\_PAPPL Glutathione S transferase E8 (Fragment) OS=Papilio polytes OX=76194 PE=2 SV=1  
 Query\_10296 XP\_013145092.1 PREDICTED: glutathione S-transferase theta-1-like [Papilio polytes]  
 Query\_10297 XP\_013142369.1 PREDICTED: glutathione S-transferase 1, isoform D-like [Papilio polytes]  
 Query\_10298 XP\_013142272.1 PREDICTED: glutathione S-transferase D7-like isoform X2 [Papilio polytes]

Query\_10299 Papilio\_polytes\_GST1-1-like\_isoform\_X1

Query\_10300 tr|A0A194PX26|A0A194PX26\_PAPXU Glutathione S-transferase theta-1 OS=Papilio xuthus OX=66420 GN=RR46\_11408 PE=3 SV=1

Query\_10301 tr|Q4R1I6|Q4R1I6\_PAPXU Glutathione-S-transferase OS=Papilio xuthus OX=66420 GN=GST-pxcs1 PE=3 SV=1

Query\_10302 tr|I4DKS5|I4DKS5\_PAPXU Glutathionetransferase OS=Papilio xuthus OX=66420 PE=2 SV=1

Query\_10303 tr|A0A194QHF9|A0A194QHF9\_PAPXU Glutathione S-transferase 1-1 OS=Papilio xuthus OX=66420 GN=RR46\_01739 PE=3 SV=1

Query\_10304 tr|I4DNY4|I4DNY4\_PAPXU Glutathionetransferase OS=Papilio xuthus OX=66420 PE=2 SV=1

Query\_10305 tr|A0A194QG68|A0A194QG68\_PAPXU Glutathione S-transferase D7 OS=Papilio xuthus OX=66420 GN=RR46\_08238 PE=3 SV=1

Query\_10306 tr|I4DQ12|I4DQ12\_PAPXU Glutathione S transferase E6 (Fragment) OS=Papilio xuthus OX=66420 PE=2 SV=1

Query\_10307 tr|E0VVCV3|E0VVCV3\_PEDHC GSTD1-5 protein, putative OS=Pediculus humanus subsp. corporis OX=121224 GN=8238066 PE=4 SV=1

Query\_10308 tr|E0VGM2|E0VGM2\_PEDHC GSTD1-5 protein, putative OS=Pediculus humanus subsp. corporis OX=121224 GN=8240051 PE=3 SV=1

Query\_10309 tr|E0VGM3|E0VGM3\_PEDHC GSTD1-5 protein, putative OS=Pediculus humanus subsp. corporis OX=121224 GN=8240052 PE=3 SV=1

Query\_10310 tr|E0VUR9|E0VUR9\_PEDHC GSTD1-5 protein, putative OS=Pediculus humanus subsp. corporis OX=121224 GN=8230516 PE=3 SV=1

Query\_10311 tr|A0A1P8L0T5|A0A1P8L0T5\_PIERA Glutathione S-transferase theta 1 OS=Pieris rapae OX=64459 PE=2 SV=1

Query\_10312 tr|A0A1P8L0U3|A0A1P8L0U3\_PIERA Glutathione S-transferase epsilon 1 OS=Pieris rapae OX=64459 PE=2 SV=1

Query\_10313 tr|A0A1P8L0T0|A0A1P8L0T0\_PIERA Glutathione S-transferase epsilon 2 OS=Pieris rapae OX=64459 PE=2 SV=1

Query\_10314 tr|A0A1P8L0T7|A0A1P8L0T7\_PIERA Glutathione S-transferase OS=Pieris rapae OX=64459 PE=2 SV=1

Query\_10315 tr|A0A1P8L0S7|A0A1P8L0S7\_PIERA Glutathione S-transferase delta 2 OS=Pieris rapae OX=64459 PE=2 SV=1

Query\_10316 tr|A0A1P8L0S9|A0A1P8L0S9\_PIERA Glutathione S-transferase delta 1 OS=Pieris rapae OX=64459 PE=2 SV=1

Query\_10317 tr|A0A1P8L0S2|A0A1P8L0S2\_PIERA Glutathione S-transferase epsilon 3 OS=Pieris rapae OX=64459 PE=2 SV=1

Query\_10318 XP\_022126447.1 glutathione S-transferase E14-like [Pieris rapae]

Query\_10319 tr|O77409|O77409\_PLUXY Glutathione S-transferase isozyme 3 OS=Plutella xylostella OX=51655 GN=GST3 PE=2 SV=1

Query\_10320 tr|Q2ABX5|Q2ABX5\_PLUXY Glutathione S-Transferase-Epsilon7 OS=Plutella xylostella OX=51655 GN=GST3 PE=2 SV=1

Query\_10321 tr|X5D044|X5D044\_PLUXY Glutathione S-transferase (Fragment) OS=Plutella xylostella OX=51655 PE=2 SV=1

Query\_10322 tr|X5CJS2|X5CJS2\_PLUXY Glutathione S-transferase OS=Plutella xylostella OX=51655 PE=2 SV=1

Query\_10323 tr|X5CYF6|X5CYF6\_PLUXY Glutathione S-transferase OS=Plutella xylostella OX=51655 PE=2 SV=1

Query\_10324 tr|X5CCB3|X5CCB3\_PLUXY Glutathione S-transferase OS=Plutella xylostella OX=51655 PE=2 SV=1

Query\_10325 tr|X5CYG4|X5CYG4\_PLUXY Glutathione S-transferase OS=Plutella xylostella OX=51655 PE=2 SV=1

Query\_10326 tr|X5CJR9|X5CJR9\_PLUXY Glutathione S-transferase OS=Plutella xylostella OX=51655 PE=2 SV=1

Query\_10327 tr|A0A1L8D6F5|A0A1L8D6F5\_PLUXY Glutathione S-Transferase-Epsilon6 OS=Plutella xylostella OX=51655 PE=2 SV=1

Query\_10328 tr|X5CHJ9|X5CHJ9\_PLUXY Glutathione S-transferase OS=Plutella xylostella OX=51655 PE=2 SV=1

Query\_10329 tr|D7URW9|D7URW9\_PLUXY Glutathione S-transferase delta OS=Plutella xylostella OX=51655 GN=PxGSTd PE=2 SV=1

Query\_10330 tr|X5CCB0|X5CCB0\_PLUXY Glutathione S-transferase OS=Plutella xylostella OX=51655 PE=2 SV=1

Query\_10331 tr|X5CJR6|X5CJR6\_PLUXY Glutathione S-transferase OS=Plutella xylostella OX=51655 PE=2 SV=1

Query\_10332 tr|X5D048|X5D048\_PLUXY Glutathione S-transferase OS=Plutella xylostella OX=51655 PE=2 SV=1

Query\_10333 tr|D2I931|D2I931\_SPOLT Glutathione S-transferase epsilon 3 OS=Spodoptera litura OX=69820 PE=2 SV=1

Query\_10334 tr|D2I930|D2I930\_SPOLT Glutathione S-transferase epsilon 2 OS=Spodoptera litura OX=69820 PE=2 SV=1

Query\_10335 tr|A0A075X2X0|A0A075X2X0\_SPOLT Glutathione S-transferase theta 1 OS=Spodoptera litura OX=69820 PE=2 SV=1

Query\_10336 tr|A0A075X3S8|A0A075X3S8\_SPOLT Glutathione S-transferase delta 4 OS=Spodoptera litura OX=69820 PE=2 SV=1

Query\_10337 tr|A0A075X2I2|A0A075X2I2\_SPOLT Glutathione S-transferase epsilon 4 OS=Spodoptera litura OX=69820 PE=2 SV=1

Query\_10338 tr|A0A075X2W2|A0A075X2W2\_SPOLT Glutathione S-transferase epsilon 15 OS=Spodoptera litura OX=69820 PE=2 SV=1

Query\_10339 tr|A0A075X8X2|A0A075X8X2\_SPOLT Glutathione S-transferase epsilon 6 OS=Spodoptera litura OX=69820 PE=2 SV=1

Query\_10340 tr|A0A075X8Y6|A0A075X8Y6\_SPOLT Glutathione S-transferase delta 3 OS=Spodoptera litura OX=69820 PE=2 SV=1

Query\_10341 tr|A0A075X244|A0A075X244\_SPOLT Glutathione S-transferase epsilon 8 OS=Spodoptera litura OX=69820 PE=2 SV=1

Query\_10342 tr|A0A075X8X7|A0A075X8X7\_SPOLT Glutathione S-transferase epsilon 11 OS=Spodoptera litura OX=69820 PE=2 SV=1

Query\_10343 tr|Q1EGY7|Q1EGY7\_SPOLT Gst1 OS=Spodoptera litura OX=69820 GN=gst1 PE=2 SV=1

Query\_10344 tr|A0A075X250|A0A075X250\_SPOLT Glutathione S-transferase epsilon 13 (Fragment) OS=Spodoptera litura OX=69820 PE=2 SV=1

Query\_10345 tr|A0A075X2W6|A0A075X2W6\_SPOLT Glutathione S-transferase delta 2 (Fragment) OS=Spodoptera litura OX=69820 PE=2 SV=1

Query\_10346 tr|A0A075X2V8|A0A075X2V8\_SPOLT Glutathione S-transferase epsilon 10 (Fragment) OS=Spodoptera litura OX=69820 PE=2 SV=1

Query\_10347 tr|A0A075X2J6|A0A075X2J6\_SPOLT Glutathione S-transferase delta 1 (Fragment) OS=Spodoptera litura OX=69820 PE=2 SV=1

Query\_10348 tr|A0A075X2I7|A0A075X2I7\_SPOLT Glutathione S-transferase epsilon 9 OS=Spodoptera litura OX=69820 PE=2 SV=1

Query\_10349 tr|A0A075X3R3|A0A075X3R3\_SPOLT Glutathione S-transferase epsilon 7 (Fragment) OS=Spodoptera litura OX=69820 PE=2 SV=1

Query\_10350 tr|A0A075X2V3|A0A075X2V3\_SPOLT Glutathione S-transferase epsilon 5 OS=Spodoptera litura OX=69820 PE=2 SV=1

Query\_10351 tr|A0A075X3R8|A0A075X3R8\_SPOLT Glutathione S-transferase epsilon 12 OS=Spodoptera litura OX=69820 PE=2 SV=1

Query\_10352 tr|A0A075X2J2|A0A075X2J2\_SPOLT Glutathione S-transferase epsilon 14 OS=Spodoptera litura OX=69820 PE=2 SV=1

Query\_10353 tr|A0A077D0A2|A0A077D0A2\_SPOLT Glutathione S-transferase epsilon 3 (Fragment) OS=Spodoptera litura OX=69820 PE=2 SV=1

Query\_10354 XP\_022837684.1 glutathione S-transferase E14-like isoform X1 [Spodoptera litura]  
Query\_10355 TC003103\_001 peptide: TC003103\_001 pep:protein\_coding  
Query\_10356 TC003104\_001 peptide: TC003104\_001 pep:protein\_coding  
Query\_10357 TC003345\_001 peptide: TC003345\_001 pep:protein\_coding  
Query\_10358 TC003347\_001 peptide: TC003347\_001 pep:protein\_coding  
Query\_10359 TC003348\_001 peptide: TC003348\_001 pep:protein\_coding  
Query\_10360 TC004442\_001 peptide: TC004442\_001 pep:protein\_coding  
Query\_10361 TC004443\_001 peptide: TC004443\_001 pep:protein\_coding  
Query\_10362 TC004444\_001 peptide: TC004444\_001 pep:protein\_coding  
Query\_10363 TC004447\_001 peptide: TC004447\_001 pep:protein\_coding  
Query\_10364 TC004448\_001 peptide: TC004448\_001 pep:protein\_coding  
Query\_10365 TC004449\_001 peptide: TC004449\_001 pep:protein\_coding  
Query\_10366 TC004450\_001 peptide: TC004450\_001 pep:protein\_coding  
Query\_10367 TC004940\_001 peptide: TC004940\_001 pep:protein\_coding  
Query\_10368 TC004941\_001 peptide: TC004941\_001 pep:protein\_coding  
Query\_10369 TC004942\_001 peptide: TC004942\_001 pep:protein\_coding  
Query\_10370 TC006215\_001 peptide: TC006215\_001 pep:protein\_coding  
Query\_10371 TC009482\_001 peptide: TC009482\_001 pep:protein\_coding  
Query\_10372 tr|A0A2W1BRE1|A0A2W1BRE1\_HELAM Uncharacterized protein  
OS=Helicoverpa armigera OX=29058 GN=HaOG200227 PE=3 SV=1

---

## **Movie Legends**

### **Movie 1. Trajectory of MD simulations of DmNobo[WT]\_EST-GSH or DmNobo[Asp113Ala]\_EST-GSH.**

The C $\alpha$  atoms of chain A of DmNobo[WT]\_EST-GSH (blue) or DmNobo[Asp113Ala]\_EST-GSH (white) in each frame were superimposed for 100 ns with those of DmNobo\_EST-GSH at the initial state. The main chain of chain A of the protein is shown by a ribbon. Asp113 in DmNobo[WT]\_EST-GSH, Ala113 in DmNobo[Asp113Ala]\_EST-GSH, GSH, and EST are represented by sticks. Carbon atoms of EST in DmNobo[WT]\_EST-GSH and those in DmNobo[Asp113Ala]\_EST-GSH are colored in blue and magenta, respectively. The colors are the same as indicated in Fig. 4D.

### **Movie 2. An enlarged view of the trajectory of EST in MD simulations for DmNobo[WT]\_EST-GSH or DmNobo[Asp113Ala]\_EST-GSH.**

An enlarged view of the trajectory of EST in MD simulations of DmNobo[WT]\_EST-GSH or DmNobo[Asp113Ala]\_EST-GSH (Movie 1)
